# Supplementary material for: A[A6Ch][Si12P20] (A = Sr, Ba; Ch = S, Se, Te): achieving a wide band gap in pnictides by constructing [A6Ch] octahedral ionic units
Source: Royal Society of Chemistry journal article supplement (doi:10.1039/d6sc00313c), 2026-05-13
Supplement: d6sc00313c1.pdf [file d6sc00313c1.pdf]

## Supporting Information

### **A[A<sub>6</sub>Ch][Si<sub>12</sub>P<sub>20</sub>] (A = Sr, Ba; Ch = S, Se, Te): Achieving Wide Band Gap of Pnictides by Constructing [A<sub>6</sub>Ch] octahedral ionic units**

Huikang Jiang<sup>1,3</sup>, Guang Peng,<sup>1</sup> Ning Ye<sup>1,2\*</sup>, Jindong Chen<sup>1,2\*</sup>

<sup>1</sup>State Key Laboratory of Crystal Materials, Tianjin Key Laboratory of Functional Crystal Materials, Institute of Functional Crystal, College of Materials Science and Engineering, Tianjin University of Technology, Tianjin 300384 (China)

<sup>2</sup>Tianjin Key Laboratory of Quantum Optics and Intelligent Photonics, School of Science, Tianjin University of Technology, Tianjin 300384 (China)

<sup>3</sup>SEU-FEI Nano-Pico Center, Key Laboratory of MEMS of Ministry of Education, School of Integrated Circuit, Southeast University, Nanjing 210096 (China)

\*E-mail: nye@email.tjut.edu.cn, cjd1225@email.tjut.edu.cn

## Table of Contents

| Section    | Title                                                                                                                                                                                                                                                                                                                                                                                                                                                                                                                                                                                                                                                          | Page |
|------------|----------------------------------------------------------------------------------------------------------------------------------------------------------------------------------------------------------------------------------------------------------------------------------------------------------------------------------------------------------------------------------------------------------------------------------------------------------------------------------------------------------------------------------------------------------------------------------------------------------------------------------------------------------------|------|
|            | Experimental Section                                                                                                                                                                                                                                                                                                                                                                                                                                                                                                                                                                                                                                           | 2    |
| Table S1   | Crystal data and structure refinement for Ba[Ba <sub>6</sub> S][Si <sub>12</sub> P <sub>20</sub> ], Ba[Ba <sub>6</sub> Se][Si <sub>12</sub> P <sub>20</sub> ], Ba[Ba <sub>6</sub> Te][Si <sub>12</sub> P <sub>20</sub> ], Ba[Ba <sub>2</sub> Sr <sub>4</sub> S][Si <sub>12</sub> P <sub>20</sub> ], Ba[Ba <sub>2</sub> Sr <sub>4</sub> Se][Si <sub>12</sub> P <sub>20</sub> ], Ba[Ba <sub>2</sub> Sr <sub>4</sub> Te][Si <sub>12</sub> P <sub>20</sub> ], Sr[Sr <sub>6</sub> Se][Si <sub>12</sub> P <sub>20</sub> ] and Sr[Sr <sub>6</sub> Te][Si <sub>12</sub> P <sub>20</sub> ].                                                                             | 5    |
| Table S2   | Atomic Coordinates ( $\times 10^4$ ) and Equivalent Isotropic Displacement Parameters ( $\text{\AA}^2 \times 10^3$ ).                                                                                                                                                                                                                                                                                                                                                                                                                                                                                                                                          | 8    |
| Table S3   | Selected bond lengths ( $\text{\AA}$ ).                                                                                                                                                                                                                                                                                                                                                                                                                                                                                                                                                                                                                        | 10   |
| Table S4   | Selected bond angles (degree).                                                                                                                                                                                                                                                                                                                                                                                                                                                                                                                                                                                                                                 | 11   |
| Table S5   | Anisotropic Displacement Parameters ( $\text{\AA}^2 \times 10^3$ ).                                                                                                                                                                                                                                                                                                                                                                                                                                                                                                                                                                                            | 13   |
| Table S6   | Crystallographic information of compounds containing six-coordinated [A <sub>6</sub> Q]/[A <sub>6</sub> X] ionic group.                                                                                                                                                                                                                                                                                                                                                                                                                                                                                                                                        | 16   |
| Table S7   | Average coordination number (ACN) of Ba/Sr-Si-P and A-M-Pn-X series compounds.                                                                                                                                                                                                                                                                                                                                                                                                                                                                                                                                                                                 | 18   |
| Figure S1  | <b>Coordination environments of Ba1 and Ba2 atoms in Ba[Ba<sub>6</sub>S][Si<sub>12</sub>P<sub>20</sub>].</b> (a) Coordination environment of Ba1. (b) Coordination environment of Ba2. (c) Truncated octahedron (Ba <sub>16</sub> S)@P <sub>32</sub> and cuboctahedron (Ba <sub>2</sub> )@P <sub>12</sub> . (d) Rock-salt sublattice packing in Ba[Ba <sub>6</sub> S][Si <sub>12</sub> P <sub>20</sub> ].                                                                                                                                                                                                                                                      | 19   |
| Figure S2  | <b>Powder XRD patterns.</b> Powder XRD patterns of the experimental and simulated for Ba[Ba <sub>6</sub> S][Si <sub>12</sub> P <sub>20</sub> ] (a), Ba[Ba <sub>6</sub> Se][Si <sub>12</sub> P <sub>20</sub> ] (b), Ba[Ba <sub>6</sub> Te][Si <sub>12</sub> P <sub>20</sub> ] (c), Ba[Ba <sub>2</sub> Sr <sub>4</sub> S][Si <sub>12</sub> P <sub>20</sub> ] (d), Ba[Ba <sub>2</sub> Sr <sub>4</sub> Se][Si <sub>12</sub> P <sub>20</sub> ] (e), Ba[Ba <sub>2</sub> Sr <sub>4</sub> Te][Si <sub>12</sub> P <sub>20</sub> ] (f), Sr[Sr <sub>6</sub> Se][Si <sub>12</sub> P <sub>20</sub> ] (g) and Sr[Sr <sub>6</sub> Te][Si <sub>12</sub> P <sub>20</sub> ] (h). | 20   |
| Figure S3  | <b>Energy-dispersive X-ray spectroscopy (EDS) analysis.</b> EDS spectra of Ba[Ba <sub>6</sub> S][Si <sub>12</sub> P <sub>20</sub> ] (a), Ba[Ba <sub>6</sub> Se][Si <sub>12</sub> P <sub>20</sub> ] (b), Ba[Ba <sub>6</sub> Te][Si <sub>12</sub> P <sub>20</sub> ] (c), Ba[Ba <sub>2</sub> Sr <sub>4</sub> S][Si <sub>12</sub> P <sub>20</sub> ] (d), Ba[Ba <sub>2</sub> Sr <sub>4</sub> Se][Si <sub>12</sub> P <sub>20</sub> ] (e), Ba[Ba <sub>2</sub> Sr <sub>4</sub> Te][Si <sub>12</sub> P <sub>20</sub> ] (f), Sr[Sr <sub>6</sub> Se][Si <sub>12</sub> P <sub>20</sub> ] (g) and Sr[Sr <sub>6</sub> Te][Si <sub>12</sub> P <sub>20</sub> ] (h).            | 21   |
| Figure S4  | <b>Optical properties.</b> (a, c, e and g) UV-Vis-NIR diffuse reflectance spectra and band gap values. (b, d, f and h) IR ATR transmission spectra and corresponding crystal photos (inset b, d, f and h).                                                                                                                                                                                                                                                                                                                                                                                                                                                     | 22   |
| Figure S5  | <b>Raman scattering spectra.</b> Raman scattering spectra of Ba[Ba <sub>6</sub> S][Si <sub>12</sub> P <sub>20</sub> ], Ba[Ba <sub>6</sub> Se][Si <sub>12</sub> P <sub>20</sub> ], Ba[Ba <sub>6</sub> Te][Si <sub>12</sub> P <sub>20</sub> ], Ba[Ba <sub>2</sub> Sr <sub>4</sub> S][Si <sub>12</sub> P <sub>20</sub> ], Ba[Ba <sub>2</sub> Sr <sub>4</sub> Se][Si <sub>12</sub> P <sub>20</sub> ], Ba[Ba <sub>2</sub> Sr <sub>4</sub> Te][Si <sub>12</sub> P <sub>20</sub> ], Sr[Sr <sub>6</sub> Se][Si <sub>12</sub> P <sub>20</sub> ] and Sr[Sr <sub>6</sub> Te][Si <sub>12</sub> P <sub>20</sub> ].                                                          | 22   |
| Figure S6  | <b>TG curves.</b> TG curves of Ba[Ba <sub>6</sub> S][Si <sub>12</sub> P <sub>20</sub> ], Ba[Ba <sub>6</sub> Se][Si <sub>12</sub> P <sub>20</sub> ] and Ba[Ba <sub>6</sub> Te][Si <sub>12</sub> P <sub>20</sub> ].                                                                                                                                                                                                                                                                                                                                                                                                                                              | 23   |
| Figure S7  | <b>Power-dependent SHG measurements</b> (a, c, e) Linear-scale plots of SHG intensity as a function of incident laser power for Ba[Ba <sub>2</sub> Sr <sub>4</sub> S][Si <sub>12</sub> P <sub>20</sub> ], Ba[Ba <sub>2</sub> Sr <sub>4</sub> Se][Si <sub>12</sub> P <sub>20</sub> ], and Ba[Ba <sub>2</sub> Sr <sub>4</sub> Te][Si <sub>12</sub> P <sub>20</sub> ], respectively; (b, d, f) the corresponding double-logarithmic plots.                                                                                                                                                                                                                        | 23   |
| Figure S8  | <b>Band structures and PDOS.</b> (a,e,i,m) Band structure diagrams, (b,f,j,n) Density of states (DOS) diagrams, (c,g,k,o) Projected density of states (PDOS) of P1 (2CN), P2/P3 (3CN) atoms. (d,h,l,p) PDOS of Ba and [Ba <sub>6</sub> Se], Ba[Ba <sub>6</sub> Te], [Sr <sub>6</sub> Se], [Sr <sub>6</sub> Te].                                                                                                                                                                                                                                                                                                                                                | 24   |
| Figure S9  | <b>ELF diagrams.</b> Slice electron localization function (ELF) field distribution of Ba[Ba <sub>6</sub> Se][Si <sub>12</sub> P <sub>20</sub> ] (a), Ba[Ba <sub>6</sub> Te][Si <sub>12</sub> P <sub>20</sub> ] (b), Sr[Sr <sub>6</sub> Se][Si <sub>12</sub> P <sub>20</sub> ] (c) and Sr[Sr <sub>6</sub> Te][Si <sub>12</sub> P <sub>20</sub> ] (d).                                                                                                                                                                                                                                                                                                           | 25   |
| Figure S10 | <b>Crystal structure and ELF diagrams.</b> (a, b) Crystal structures of BaSi <sub>7</sub> P <sub>10</sub> and BaGe <sub>2</sub> P <sub>2</sub> ; (c, d) corresponding slice ELF field distributions.                                                                                                                                                                                                                                                                                                                                                                                                                                                           | 26   |

## Experimental Section

### Raw Materials.

The raw materials were Ba (5N, Adamas), Sr (4N, Adamas), Si (5N, Adamas), P (5N, Adamas), S (4N, Adamas), Se (4N, Adamas), Te (4N, Adamas), KI (5N, Adamas) and SrBr<sub>2</sub> (5N, Adamas), which were not further purified.

### Salt-Flux Synthesis.

**Ba[Ba<sub>6</sub>S][Si<sub>12</sub>P<sub>20</sub>], Ba[Ba<sub>6</sub>Se][Si<sub>12</sub>P<sub>20</sub>], Ba[Ba<sub>6</sub>Te][Si<sub>12</sub>P<sub>20</sub>], Sr[Sr<sub>6</sub>Se][Si<sub>12</sub>P<sub>20</sub>] and Sr[Sr<sub>6</sub>Te][Si<sub>12</sub>P<sub>20</sub>]:** Ba/Sr, Si, P, S/Se/Te and KI at a molar ratio of 7:12:20:1:12-20 are mixed and thoroughly ground, and then placed in quartz tubes which is evacuated to  $1 \times 10^{-3}$  Pa and flame-sealed. The tubes were placed in a muffle furnace and was heated to 900°C/900°C/950°C/800°C/850°C, hold at that temperature for 96-120 hours, slowly cooled at -5°C/h to 500°C, and then cool it to room temperature at -10°C/h. The quartz tube is opened in a well-ventilated area, and the product is washed using deionized water to remove the KI flux. The yield of title compounds was up to 95%

**Ba[Ba<sub>2</sub>Sr<sub>4</sub>S][Si<sub>12</sub>P<sub>20</sub>], Ba[Ba<sub>2</sub>Sr<sub>4</sub>Se][Si<sub>12</sub>P<sub>20</sub>], Ba[Ba<sub>2</sub>Sr<sub>4</sub>Te][Si<sub>12</sub>P<sub>20</sub>]:** Ba, Si, P, S/Se/Te and SrBr<sub>2</sub> at a molar ratio of 7:12:20:1: 20 are mixed. Other operations were similar to the former, except that the constant temperature should be 1000°C/1000°C/1050°C, respectively.

### Single-Crystal X-Ray Diffraction.

The diffraction data were collected on a Bruker D8 VENTURE diffractometer and Mo K $\alpha$  radiation ( $\lambda = 0.71073$  Å). The data was integrated by SHELXL-2018/3, and the multi-scan method was used to the absorption corrections. The crystal structure of the two compounds was determined by the intrinsic phasing methods and refined with anisotropic thermal parameters for all atoms by full-matrix least-squares fitting on F<sup>2</sup> using SHELXL on Olex2 program.<sup>1,2</sup> The PLATON program was used to check the correctness of the structures, and no higher symmetries were found.<sup>3</sup> The crystal data and structure refinement parameters were shown in Table S1. Some structural parameters including Atomic Coordinates ( $\times 10^4$ ) and Equivalent Isotropic Displacement Parameters ( $\text{Å}^2 \times 10^3$ ), Selected bond lengths (Å) and Anisotropic Displacement Parameters ( $\text{Å}^2 \times 10^3$ ) are listed in Table S2, Table S3, and Table S4.

### Powder X-Ray Diffraction (PXRD).

The PXRD measurements of compounds were conducted utilizing a Rigaku Smart Lab 9kW diffractometer equipped with a diffracted monochromator setting for Cu K $\alpha$  radiation ( $\lambda = 1.5418$  Å). The experimental data were characterized at ambient temperature within the  $2\theta$  range of 10–70°, at a step size of 0.01° and a step time of 2 s. The powder XRD patterns was in good agreement with the calculated derived from the crystallographic information file

(CIF), which indicates that the pure phase is obtained.

### **Elemental Analysis.**

The elemental composition analysis was performed on a field-emission scanning electron microscope (Quanta FEG 250) equipped with an energy-dispersive X-ray spectrometer.

### **UV-Vis-NIR transmittance and diffuse reflectance spectrum.**

The powder sample was uniformly pressed into a pellet to ensure a flat surface with BaSO<sub>4</sub> as 100% reflectance standard. The UV-Vis-NIR diffuse reflectance spectrum was collected using a HITACHI UH4150 spectrophotometer in the range of 190–2500 nm with a scan speed of 300 nm/min. The obtained diffuse reflectance data were processed using the Kubelka-Munk equation  $F(R) = \frac{K}{S} =$

$\frac{(1-R)^2}{2R}$  (where  $R$  is the diffuse reflectance coefficient,  $K$  is the absorption coefficient, and  $S$  is the scattering coefficient) The band gap energy was determined by plotting the photon energy  $h\nu$  on the x-axis and  $F(R)$  on the y-axis, drawing a tangent line at the absorption edge, and extrapolating it to the x-axis. This method provides an important basis for evaluating the electronic structure and optical absorption characteristics of nonlinear optical materials.<sup>4</sup>

### **IR transmittance spectrum.**

The IR spectrum was recorded using a Nicolet iS50 FT-IR spectrometer at room temperature in the range of 400-4000 cm<sup>-1</sup> for sample. A sample of ~10 mg was used for testing.

### **Raman Spectroscopy.**

The Raman spectra of the compounds were obtained by a confocal microscope laser Raman spectrometer (inVia Qontor) equipped with a CCD detector. The radiation wavelength was 532 nm, and the laser intensity was 5%.

### **Thermal Analysis.**

Thermogravimetric (TG) were performed on a NETZSCH 209F3A unit in N<sub>2</sub> atmosphere at 10 °C/min heating rate from 40 to 900°C. Approximate 5-10mg of title compounds were ground into fine powders and enclosed in Al<sub>2</sub>O<sub>3</sub> crucibles.

### **Polycrystalline Second Harmonic Generation (SHG) Measurements.**

Polycrystalline SHG responses were measured with the Kurtz-Perry method<sup>5</sup> using Q-switched Nd: YAG solid-state laser of wavelength 2050 nm. For polycrystalline samples were ground and sieved into several distinct particle size ranges of 25-45, 45-58, 58-75, 75-106, 106-150 and 150-212 μm, and then pressed into the container with a thickness of 1mm and diameter of 8 mm.

Polycrystalline AgGaS<sub>2</sub> was prepared with the same size range as the comparison reference. Power-dependent SHG responses were measured using an OPO laser system (10 ns, 5 Hz) of wavelength ~3 μm. The incident laser power was tuned from 6.2 to 14.3 mW.

### **Theoretical Calculation Details.**

The electronic structure calculations were performed by the first-principles calculations in the CASTEP package based on density functional theory, with the Norm-conserving pseudopotentials.<sup>6-12</sup> The Perdew-Burke-Ernzerhof (PBE) functional within the generalized gradient approximation (GGA) was applied for the exchange-correlation potential.<sup>13,14</sup> The following orbital electrons were treated as valence electrons, Ba: 4d<sup>10</sup>5p<sup>6</sup>6s<sup>2</sup>, Sr: 3d<sup>10</sup>4p<sup>6</sup>5s<sup>2</sup>, Si: 3s<sup>2</sup>3p<sup>2</sup>, P: 3s<sup>2</sup>3p<sup>3</sup>, S: 3s<sup>2</sup>3p<sup>4</sup>/Se: 4s<sup>2</sup>4p<sup>4</sup>/Te: 5s<sup>2</sup>5p<sup>4</sup>. To achieve energy convergence, the plane-wave energy cutoff was set at 720 eV. The Monkhorst-Pack grid size for self-consistent field calculation is 2 × 2 × 2.<sup>15-18</sup> Because of the discontinuity of exchange correlation, bandgaps calculated by the GGA method are usually smaller than experimental values, so a scissor operator was adopted to raise the CBs to match the experimental value for optical property calculation. ELF isosurface labels: The isosurface values range from 0 to 1, with a contour interval of 2.5 × 10<sup>-1</sup>. EDD electron cloud settings: The density threshold (Isovalue) for the electron cloud display is set to 0.09, and the type is Normal.

**Table S1.** Crystal data and structure refinement for Ba[Ba<sub>6</sub>S][Si<sub>12</sub>P<sub>20</sub>], Ba[Ba<sub>6</sub>Se][Si<sub>12</sub>P<sub>20</sub>], Ba[Ba<sub>6</sub>Te][Si<sub>12</sub>P<sub>20</sub>], Ba[Ba<sub>2</sub>Sr<sub>4</sub>S][Si<sub>12</sub>P<sub>20</sub>], Ba[Ba<sub>2</sub>Sr<sub>4</sub>Se][Si<sub>12</sub>P<sub>20</sub>], Ba[Ba<sub>2</sub>Sr<sub>4</sub>Te][Si<sub>12</sub>P<sub>20</sub>], Sr[Sr<sub>6</sub>Se][Si<sub>12</sub>P<sub>20</sub>] and Sr[Sr<sub>6</sub>Te][Si<sub>12</sub>P<sub>20</sub>].

| Formula                                                    | Ba[Ba <sub>6</sub> S][Si <sub>12</sub> P <sub>20</sub> ] | Ba[Ba <sub>6</sub> Se][Si <sub>12</sub> P <sub>20</sub> ] | Ba[Ba <sub>6</sub> Te][Si <sub>12</sub> P <sub>20</sub> ] |
|------------------------------------------------------------|----------------------------------------------------------|-----------------------------------------------------------|-----------------------------------------------------------|
| CCDC Number                                                | 2522060                                                  | 2522062                                                   | 2522061                                                   |
| Formula weight                                             | 1949.92                                                  | 1996.82                                                   | 2045.46                                                   |
| Temperature (K)                                            | 293.00                                                   | 293.00                                                    | 293.00                                                    |
| Radiation                                                  | Mo K $\alpha$<br>(0.71073 Å)                             | Mo K $\alpha$<br>(0.71073 Å)                              | Mo K $\alpha$<br>(0.71073 Å)                              |
| Crystal system                                             | cubic                                                    | cubic                                                     | cubic                                                     |
| Space group                                                | <i>Fm</i> $\bar{3}$ <i>m</i>                             | <i>Fm</i> $\bar{3}$ <i>m</i>                              | <i>Fm</i> $\bar{3}$ <i>m</i>                              |
| <i>a</i> (Å)                                               | 15.701(5)                                                | 15.7503(6)                                                | 15.826(8)                                                 |
| <i>b</i> (Å)                                               | 15.701(5)                                                | 15.7503(6)                                                | 15.826(8)                                                 |
| <i>c</i> (Å)                                               | 15.701(5)                                                | 15.7503(6)                                                | 15.826(8)                                                 |
| $\alpha$ (deg)                                             | 90                                                       | 90                                                        | 90                                                        |
| $\beta$ (deg)                                              | 90                                                       | 90                                                        | 90                                                        |
| $\gamma$ (deg)                                             | 90                                                       | 90                                                        | 90                                                        |
| Volume (Å <sup>3</sup> )                                   | 3871.0                                                   | 3907.2(4)                                                 | 3964.1                                                    |
| Z                                                          | 4                                                        | 4                                                         | 4                                                         |
| $\rho_{\text{calc}}$ (g/cm <sup>3</sup> )                  | 3.346                                                    | 3.395                                                     | 3.427                                                     |
| $\mu$ (mm <sup>-1</sup> )                                  | 8.267                                                    | 9.068                                                     | 8.741                                                     |
| F (000)                                                    | 3504.0                                                   | 3576.0                                                    | 3648.0                                                    |
| Reflections collected                                      | 8782                                                     | 14855                                                     | 9918                                                      |
| R <sub>int</sub>                                           | 0.0390                                                   | 0.0780                                                    | 0.0428                                                    |
| R <sub>1</sub> [ <i>I</i> $\geq$ 2 $\sigma$ ( <i>I</i> )]  | 0.0110                                                   | 0.0239                                                    | 0.0140                                                    |
| wR <sub>2</sub> [ <i>I</i> $\geq$ 2 $\sigma$ ( <i>I</i> )] | 0.0228                                                   | 0.0471                                                    | 0.0327                                                    |
| R <sub>1</sub> [all data]                                  | 0.0111                                                   | 0.0248                                                    | 0.0151                                                    |
| wR <sub>2</sub> [all data]                                 | 0.0228                                                   | 0.0472                                                    | 0.0331                                                    |
| Goodness-of-fit on F <sup>2</sup>                          | 1.191                                                    | 1.201                                                     | 1.065                                                     |

| Formula                                                    | Ba[Ba <sub>2</sub> Sr <sub>4</sub> S][Si <sub>12</sub> P <sub>20</sub> ] | Ba[Ba <sub>2</sub> Sr <sub>4</sub> Se][Si <sub>12</sub> P <sub>20</sub> ] | Ba[Ba <sub>2</sub> Sr <sub>4</sub> Te][Si <sub>12</sub> P <sub>20</sub> ] |
|------------------------------------------------------------|--------------------------------------------------------------------------|---------------------------------------------------------------------------|---------------------------------------------------------------------------|
| CCDC Number                                                | 2522057                                                                  | 2522058                                                                   | 2522059                                                                   |
| Formula weight                                             | 1751.04                                                                  | 1797.94                                                                   | 1846.58                                                                   |
| Temperature (K)                                            | 293.00                                                                   | 293.00                                                                    | 293.00                                                                    |
| Radiation                                                  | Mo K $\alpha$<br>(0.71073 Å)                                             | Mo K $\alpha$<br>(0.71073 Å)                                              | Mo K $\alpha$<br>(0.71073 Å)                                              |
| Crystal system                                             | cubic                                                                    | cubic                                                                     | cubic                                                                     |
| Space group                                                | <i>F</i> $\bar{4}3m$                                                     | <i>F</i> $\bar{4}3m$                                                      | <i>F</i> $\bar{4}3m$                                                      |
| <i>a</i> (Å)                                               | 15.5666(6)                                                               | 15.5813(5)                                                                | 15.6412(4)                                                                |
| <i>b</i> (Å)                                               | 15.5666(6)                                                               | 15.5813(5)                                                                | 15.6412(4)                                                                |
| <i>c</i> (Å)                                               | 15.5666(6)                                                               | 15.5813(5)                                                                | 15.6412(4)                                                                |
| $\alpha$ (deg)                                             | 90                                                                       | 90                                                                        | 90                                                                        |
| $\beta$ (deg)                                              | 90                                                                       | 90                                                                        | 90                                                                        |
| $\gamma$ (deg)                                             | 90                                                                       | 90                                                                        | 90                                                                        |
| Volume (Å <sup>3</sup> )                                   | 3772.1(5)                                                                | 3782.8(4)                                                                 | 3826.6(3)                                                                 |
| Z                                                          | 4                                                                        | 4                                                                         | 4                                                                         |
| $\rho_{\text{calc}}$ (g/cm <sup>3</sup> )                  | 3.083                                                                    | 3.157                                                                     | 3.205                                                                     |
| $\mu$ (mm <sup>-1</sup> )                                  | 9.989                                                                    | 10.868                                                                    | 10.540                                                                    |
| F (000)                                                    | 3216.0                                                                   | 3288.0                                                                    | 3360.0                                                                    |
| Reflections collected                                      | 5057                                                                     | 2800                                                                      | 4115                                                                      |
| Rint                                                       | 0.1263                                                                   | 0.0255                                                                    | 0.0377                                                                    |
| R <sub>1</sub> [ <i>I</i> $\geq$ 2 $\sigma$ ( <i>I</i> )]  | 0.0328                                                                   | 0.0171                                                                    | 0.0168                                                                    |
| wR <sub>2</sub> [ <i>I</i> $\geq$ 2 $\sigma$ ( <i>I</i> )] | 0.0705                                                                   | 0.0400                                                                    | 0.0413                                                                    |
| R <sub>1</sub> [all data]                                  | 0.0387                                                                   | 0.0179                                                                    | 0.0186                                                                    |
| wR <sub>2</sub> [all data]                                 | 0.0726                                                                   | 0.0402                                                                    | 0.0421                                                                    |
| Flack x TWIN/<br>Parsons                                   | 0.46(9)                                                                  | 0.50(8)                                                                   | 0.35(9)                                                                   |
| Hoof t y                                                   | 0.08(7)                                                                  | 0.07(4)                                                                   | 0.03(5)                                                                   |
| Goodness-of-fit on F <sup>2</sup>                          | 1.059                                                                    | 1.182                                                                     | 1.105                                                                     |

| <b>Formula</b>                                             | <b>Sr[Sr<sub>6</sub>Se][Si<sub>12</sub>P<sub>20</sub>]</b> | <b>Sr[Sr<sub>6</sub>Te][Si<sub>12</sub>P<sub>20</sub>]</b> |
|------------------------------------------------------------|------------------------------------------------------------|------------------------------------------------------------|
| CCDC Number                                                | 2522064                                                    | 2522063                                                    |
| Formula weight                                             | 1648.78                                                    | 1697.420                                                   |
| Temperature (K)                                            | 293.00                                                     | 293.00                                                     |
| Radiation                                                  | Mo K $\alpha$<br>(0.71073 Å)                               | Mo K $\alpha$<br>(0.71073 Å)                               |
| Crystal system                                             | cubic                                                      | cubic                                                      |
| Space group                                                | <i>Fm</i> $\bar{3}$ <i>m</i>                               | <i>Fm</i> $\bar{3}$ <i>m</i>                               |
| <i>a</i> (Å)                                               | 15.5303(15)                                                | 15.6033(6)                                                 |
| <i>b</i> (Å)                                               | 15.5303(15)                                                | 15.6033(6)                                                 |
| <i>c</i> (Å)                                               | 15.5303(15)                                                | 15.6033(6)                                                 |
| $\alpha$ (deg)                                             | 90                                                         | 90                                                         |
| $\beta$ (deg)                                              | 90                                                         | 90                                                         |
| $\gamma$ (deg)                                             | 90                                                         | 90                                                         |
| Volume (Å <sup>3</sup> )                                   | 3745.8(11)                                                 | 3798.8(3)                                                  |
| Z                                                          | 4                                                          | 4                                                          |
| $\rho_{\text{calc}}$ (g/cm <sup>3</sup> )                  | 2.924                                                      | 2.968                                                      |
| $\mu$ (mm <sup>-1</sup> )                                  | 12.113                                                     | 11.738                                                     |
| F (000)                                                    | 3072.0                                                     | 3114.6                                                     |
| Reflections collected                                      | 9442                                                       | 9550                                                       |
| Rint                                                       | 0.0851                                                     | 0.1064                                                     |
| R <sub>1</sub> [ <i>I</i> $\geq$ 2 $\sigma$ ( <i>I</i> )]  | 0.0309                                                     | 0.0179                                                     |
| wR <sub>2</sub> [ <i>I</i> $\geq$ 2 $\sigma$ ( <i>I</i> )] | 0.0734                                                     | 0.0357                                                     |
| R <sub>1</sub> [all data]                                  | 0.0487                                                     | 0.0261                                                     |
| wR <sub>2</sub> [all data]                                 | 0.0794                                                     | 0.0375                                                     |
| Goodness-of-fit on F <sup>2</sup>                          | 1.157                                                      | 1.035                                                      |

**Table S2.** Atomic Coordinates ( $\times 10^4$ ) and Equivalent Isotropic Displacement Parameters ( $\text{\AA}^2 \times 10^3$ ) and bond valence sums (BVS).

| Atom                                                                    | Wyckoff site | occupancy | x         | y          | z         | U(eq)     | BVS  |
|-------------------------------------------------------------------------|--------------|-----------|-----------|------------|-----------|-----------|------|
| <b>Ba[Ba<sub>6</sub>S][Si<sub>12</sub>P<sub>20</sub>]</b>               |              |           |           |            |           |           |      |
| Ba1                                                                     | 24e          | 1         | 2064.0(2) | 5000       | 5000      | 13.96(11) | 1.98 |
| Ba2                                                                     | 4b           | 1         | 5000      | 5000       | 5000      | 70.8(4)   | 1.85 |
| Si1                                                                     | 48g          | 1         | 2500      | 2500       | 4124.2(5) | 9.17(17)  | 3.90 |
| P1                                                                      | 48i          | 1         | 3289.8(3) | 3289.8(3)  | 5000      | 11.17(17) | 2.89 |
| P2                                                                      | 32f          | 1         | 1643.6(3) | 3356.4(3)  | 3356.4(3) | 9.5(2)    | 3.30 |
| S1                                                                      | 4a           | 1         | 0         | 5000       | 5000      | 12.1(5)   | 1.88 |
| <b>Ba[Ba<sub>6</sub>Se][Si<sub>12</sub>P<sub>20</sub>]</b>              |              |           |           |            |           |           |      |
| Ba1                                                                     | 24e          | 1         | 5000      | 5000       | 2093.2(4) | 15.2(2)   | 2.05 |
| Ba2                                                                     | 4b           | 1         | 5000      | 5000       | 5000      | 84.5(12)  | 1.92 |
| Si1                                                                     | 48g          | 1         | 7500      | 4121.4(13) | 2500      | 10.7(4)   | 3.86 |
| P1                                                                      | 48i          | 1         | 6713.7(8) | 5000       | 3286.3(8) | 11.3(4)   | 2.88 |
| P2                                                                      | 32f          | 1         | 6644.5(9) | 3355.5(9)  | 1644.5(9) | 10.3(5)   | 3.25 |
| Se1                                                                     | 4a           | 1         | 5000      | 5000       | 0         | 13.2(6)   | 1.94 |
| <b>Ba[Ba<sub>6</sub>Te][Si<sub>12</sub>P<sub>20</sub>]</b>              |              |           |           |            |           |           |      |
| Ba1                                                                     | 24e          | 1         | 5000      | 5000       | 2147.0(2) | 16.26(15) | 2.21 |
| Ba2                                                                     | 4b           | 1         | 5000      | 5000       | 5000      | 115.1(10) | 1.96 |
| Si1                                                                     | 48g          | 1         | 7500      | 4117.6(7)  | 2500      | 9.8(2)    | 3.83 |
| P1                                                                      | 48i          | 1         | 6721.4(4) | 5000       | 3278.6(4) | 11.6(2)   | 2.92 |
| P2                                                                      | 32f          | 1         | 6648.0(5) | 3352.0(5)  | 1648.0(5) | 10.4(3)   | 3.19 |
| Te1                                                                     | 4a           | 1         | 5000      | 5000       | 0         | 16.7(2)   | 2.14 |
| <b>Ba[Ba<sub>2</sub>Sr<sub>4</sub>S][Si<sub>12</sub>P<sub>20</sub>]</b> |              |           |           |            |           |           |      |
| Ba1/Sr1                                                                 | 24f          | 0.33/0.67 | 7911.4(7) | 5000       | 5000      | 22.5(4)   | 1.89 |
| Ba2                                                                     | 4b           | 1         | 5000      | 5000       | 5000      | 63.9(9)   | 1.82 |
| Si1                                                                     | 24g          | 1         | 7500      | 5868(6)    | 7500      | 13(3)     | 3.83 |
| Si2                                                                     | 24g          | 1         | 7500      | 4114(5)    | 7500      | 10(3)     | 4.12 |

|    |     |   |            |         |            |          |      |
|----|-----|---|------------|---------|------------|----------|------|
| P1 | 48h | 1 | 6700.9(10) | 4994(5) | 6700.9(10) | 14.6(6)  | 2.76 |
| P2 | 16e | 1 | 8387(5)    | 6613(5) | 6613(5)    | 7(2)     | 3.11 |
| P3 | 16e | 1 | 8341(5)    | 3341(5) | 6659(5)    | 15(3)    | 3.57 |
| S1 | 4a  | 1 | 10000      | 5000    | 5000       | 14.4(15) | 1.88 |

---

**Ba[Ba<sub>2</sub>Sr<sub>4</sub>Se][Si<sub>12</sub>P<sub>20</sub>]**

---

|         |     |           |           |           |         |          |      |
|---------|-----|-----------|-----------|-----------|---------|----------|------|
| Ba1/Sr1 | 24f | 0.33/0.67 | 5000      | 2109.1(3) | 5000    | 18.1(2)  | 1.91 |
| Ba2     | 4b  | 1         | 5000      | 5000      | 5000    | 51.5(4)  | 1.84 |
| Si1     | 24g | 1         | 2500      | 2500      | 4126(5) | 7.1(16)  | 3.89 |
| Si2     | 24g | 1         | 2500      | 2500      | 5879(5) | 11.3(17) | 4.01 |
| P1      | 48h | 1         | 3297.8(5) | 3297.8(5) | 4998(4) | 11.7(3)  | 2.78 |
| P2      | 16e | 1         | 3378(3)   | 1622(3)   | 3378(3) | 9.9(17)  | 3.18 |
| P3      | 16e | 1         | 3353(3)   | 1647(3)   | 6647(3) | 9.1(18)  | 3.40 |
| Se1     | 4a  | 1         | 5000      | 0         | 5000    | 19.2(4)  | 1.79 |

---

**Ba[Ba<sub>2</sub>Sr<sub>4</sub>Te][Si<sub>12</sub>P<sub>20</sub>]**

---

|         |     |           |           |           |         |          |      |
|---------|-----|-----------|-----------|-----------|---------|----------|------|
| Ba1/Sr1 | 24f | 0.33/0.67 | 7841.4(4) | 5000      | 5000    | 20.0(2)  | 1.93 |
| Ba2     | 4b  | 1         | 5000      | 5000      | 5000    | 59.7(5)  | 1.85 |
| Si1     | 24g | 1         | 7500      | 7500      | 4111(4) | 11.2(15) | 3.91 |
| Si2     | 24g | 1         | 7500      | 7500      | 5875(3) | 6.1(13)  | 3.94 |
| P1      | 48h | 1         | 6707.9(5) | 6707.9(5) | 5007(4) | 11.0(3)  | 2.79 |
| P2      | 16e | 1         | 8356(3)   | 6644(3)   | 3356(3) | 9.0(14)  | 3.17 |
| P3      | 16e | 1         | 8368(3)   | 6632(3)   | 6632(3) | 8.8(14)  | 3.35 |
| Te1     | 4a  | 1         | 10000     | 5000      | 5000    | 22.7(3)  | 1.85 |

---

**Sr[Sr<sub>6</sub>Se][Si<sub>12</sub>P<sub>20</sub>]**

---

|     |     |   |           |           |           |         |      |
|-----|-----|---|-----------|-----------|-----------|---------|------|
| Sr1 | 24e | 1 | 5000      | 7857.4(6) | 5000      | 36.7(3) | 1.91 |
| Sr2 | 4b  | 1 | 5000      | 5000      | 5000      | 235(5)  | 1.82 |
| Si1 | 48g | 1 | 7500      | 7500      | 5876.2(9) | 25.2(4) | 4.09 |
| P1  | 48i | 1 | 6700.5(7) | 6700.5(7) | 5000      | 27.3(4) | 2.76 |
| P2  | 32f | 1 | 6634.7(7) | 8365.3(7) | 6634.7(7) | 25.9(4) | 3.31 |
| Se1 | 4a  | 1 | 5000      | 10000     | 5000      | 27.8(5) | 1.96 |

---

**Sr[Sr<sub>6</sub>Te][Si<sub>12</sub>P<sub>20</sub>]**

---

|     |     |   |           |           |           |         |      |
|-----|-----|---|-----------|-----------|-----------|---------|------|
| Sr1 | 24e | 1 | 5000      | 7813.1(5) | 5000      | 22.2(2) | 1.94 |
| Sr2 | 4b  | 1 | 5000      | 5000      | 5000      | 189(4)  | 1.86 |
| Si1 | 48g | 1 | 5880.4(8) | 7500      | 7500      | 12.0(3) | 3.96 |
| P1  | 48i | 1 | 5000      | 6705.8(5) | 6705.8(5) | 14.2(3) | 2.75 |
| P2  | 32f | 1 | 6636.1(6) | 8363.9(6) | 6636.1(6) | 12.8(3) | 3.25 |
| Te1 | 4a  | 1 | 5000      | 10000     | 5000      | 16.1(3) | 1.89 |

**Table S3.** Selected bond lengths (Å).

| Bond                                                                    | Length/Å   | Bond                                                                     | Length/Å                                                   | Bond                                                                     | Length/Å   |            |
|-------------------------------------------------------------------------|------------|--------------------------------------------------------------------------|------------------------------------------------------------|--------------------------------------------------------------------------|------------|------------|
| <b>Ba[Ba<sub>6</sub>S][Si<sub>12</sub>P<sub>20</sub>]</b>               |            | <b>Ba[Ba<sub>6</sub>Se][Si<sub>12</sub>P<sub>20</sub>]</b>               |                                                            | <b>Ba[Ba<sub>6</sub>Te][Si<sub>12</sub>P<sub>20</sub>]</b>               |            |            |
| Ba1-S1                                                                  | 3.2407(3)  | Ba1-Se1                                                                  | 3.2969(7)                                                  | Ba1-Te1                                                                  | 3.3979(4)  |            |
| P1-Si1                                                                  | 2.2286(8)  | P1-Si1                                                                   | 2.2322(19)                                                 | P1-Si1                                                                   | 2.2332(10) |            |
| P1-Si1#9                                                                | 2.2286(8)  | P1-Si1#9                                                                 | 2.2322(19)                                                 | P1-Si1#9                                                                 | 2.2332(10) |            |
| P2-Si1                                                                  | 2.2517(5)  | P2-Si1                                                                   | 2.2553(14)                                                 | P2-Si1                                                                   | 2.2593(7)  |            |
| P2-Si1#10                                                               | 2.2517(5)  | P2-Si1#6                                                                 | 2.2553(14)                                                 | P2-Si1#5                                                                 | 2.2593(7)  |            |
| P2-Si#15                                                                | 2.2517(5)  | P2-Si1#8                                                                 | 2.2553(14)                                                 | P2-Si1#8                                                                 | 2.2593(7)  |            |
| <b>Ba[Ba<sub>2</sub>Sr<sub>4</sub>S][Si<sub>12</sub>P<sub>20</sub>]</b> |            | <b>Ba[Ba<sub>2</sub>Sr<sub>4</sub>Se][Si<sub>12</sub>P<sub>20</sub>]</b> |                                                            | <b>Ba[Ba<sub>2</sub>Sr<sub>4</sub>Te][Si<sub>12</sub>P<sub>20</sub>]</b> |            |            |
| Ba1/Sr1-S1                                                              | 3.2512(11) | Ba1/Sr1-Se1                                                              | 3.2866(5)                                                  | Ba1/Sr1-Te1                                                              | 3.3763(6)  |            |
| P1-Si1                                                                  | 2.223(8)   | P1-Si1                                                                   | 2.222(5)                                                   | P1-Si1                                                                   | 2.244(5)   |            |
| P1-Si2                                                                  | 2.230(8)   | P1-Si2                                                                   | 2.230(5)                                                   | P1-Si2                                                                   | 2.216(5)   |            |
| P2-Si1                                                                  | 2.271(6)   | P2-Si1                                                                   | 2.258(5)                                                   | P2-Si1                                                                   | 2.232(4)   |            |
| P2-Si1#5                                                                | 2.271(6)   | P2-Si1#17                                                                | 2.259(5)                                                   | P2#6-Si1                                                                 | 2.232(4)   |            |
| P2-Si1#6                                                                | 2.271(6)   | P2-Si1#18                                                                | 2.259(5)                                                   | P2#9-Si1                                                                 | 2.232(4)   |            |
| P3-Si2                                                                  | 2.209(6)   | P3-Si2                                                                   | 2.229(5)                                                   | P3-Si2                                                                   | 2.255(4)   |            |
| P3#7-Si2                                                                | 2.209(6)   | P3#19-Si2                                                                | 2.229(5)                                                   | P3#9-Si2                                                                 | 2.255(4)   |            |
| <b>Sr[Sr<sub>6</sub>Se][Si<sub>12</sub>P<sub>20</sub>]</b>              |            |                                                                          | <b>Sr[Sr<sub>6</sub>Te][Si<sub>12</sub>P<sub>20</sub>]</b> |                                                                          |            |            |
| Sr1-Se1                                                                 |            |                                                                          | 3.3274(10)                                                 | Sr1-Te1                                                                  |            | 3.4123(7)  |
| P1-Si1                                                                  |            |                                                                          | 2.2214(14)                                                 | P1-Si1                                                                   |            | 2.2267(12) |
| P1-Si1#11                                                               |            |                                                                          | 2.2214(14)                                                 | P1-Si1#13                                                                |            | 2.2267(12) |
| P2-Si1                                                                  |            |                                                                          | 2.2359(10)                                                 | P2-Si1                                                                   |            | 2.2416(8)  |

|          |            |           |           |
|----------|------------|-----------|-----------|
| P2-Si1#6 | 2.2359(10) | P2-Si1#10 | 2.2416(8) |
| P2-Si#12 | 2.2359(10) | P2-Si#12  | 2.2416(8) |

**Table S4.** Selected bond angles (degree).

| Bond-                                                                   | Angles/<br>degree | Bond                                                                     | Angles/<br>degree | Bond                                                                     | Angles/<br>degree |
|-------------------------------------------------------------------------|-------------------|--------------------------------------------------------------------------|-------------------|--------------------------------------------------------------------------|-------------------|
| <b>Ba[Ba<sub>6</sub>S][Si<sub>12</sub>P<sub>20</sub>]</b>               |                   | <b>Ba[Ba<sub>6</sub>Se][Si<sub>12</sub>P<sub>20</sub>]</b>               |                   | <b>Ba[Ba<sub>6</sub>Te][Si<sub>12</sub>P<sub>20</sub>]</b>               |                   |
| Si1 <sup>10</sup> -P1-Si1                                               | 76.19(4)          | Si1 <sup>16</sup> -P1-Si1                                                | 76.62(10)         | Si1 <sup>14</sup> -P1-Si1                                                | 77.42(5)          |
| Si1-P1-Ba1 <sup>9</sup>                                                 | 97.36(10)         | Si1-P1-Ba1                                                               | 97.95(2)          | Si1-P1-Ba1                                                               | 99.09(12)         |
| Si1-P2-Si1 <sup>4</sup>                                                 | 106.43(3)         | Si1-P2-Si1 <sup>6</sup>                                                  | 106.39(8)         | Si1-P2-Si1 <sup>5</sup>                                                  | 106.49(4)         |
| Ba1 <sup>3</sup> -S1-Ba1 <sup>2</sup>                                   | 180.0             | Ba1-Se1-Ba1 <sup>9</sup>                                                 | 180.0             | Ba1 <sup>1</sup> -Te1-Ba1 <sup>2</sup>                                   | 180.0             |
| Ba1 <sup>1</sup> -S1-Ba1                                                | 90.0              | Ba1-Se1-Ba1 <sup>8</sup>                                                 | 90.0              | Ba1 <sup>1</sup> -Te1-Ba1                                                | 90.0              |
| Ba1 <sup>3</sup> -Ba1-Ba1 <sup>1</sup>                                  | 60.0              | Ba1 <sup>1</sup> -Ba1-Ba1 <sup>2</sup>                                   | 60.0              | Ba1 <sup>3</sup> -Ba1-Ba1 <sup>2</sup>                                   | 60.0              |
| Ba1 <sup>3</sup> -Ba1-Ba1 <sup>2</sup>                                  | 90.0              | Ba1 <sup>4</sup> -Ba1-Ba1 <sup>2</sup>                                   | 90.0              | Ba1 <sup>3</sup> -Ba1-Ba1 <sup>4</sup>                                   | 90.0              |
| P1-Ba1-P1 <sup>4</sup>                                                  | 70.16(14)         | P1-Ba1-P1 <sup>6</sup>                                                   | 70.95(3)          | P1-Ba1-P1 <sup>7</sup>                                                   | 72.44(17)         |
| P1 <sup>6</sup> -Ba1-P1                                                 | 108.73(3)         | P1-Ba1-P1 <sup>4</sup>                                                   | 110.31(7)         | P1-Ba1-P1 <sup>6</sup>                                                   | 113.36(4)         |
| P1-Ba1- S1                                                              | 125.63(14)        | P1-Ba1-Se1                                                               | 124.85(3)         | P1-Ba1-Te1                                                               | 123.32(18)        |
| S1-Ba1-Ba1 <sup>2</sup>                                                 | 45.0              | Se1-Ba1-Ba1 <sup>1</sup>                                                 | 45.0              | Te1-Ba1-Ba1 <sup>2</sup>                                                 | 45.0              |
| Ba1-Ba2-Ba1 <sup>16</sup>                                               | 180.0             | Ba1-Ba2-Ba1 <sup>11</sup>                                                | 180.0             | Ba1-Ba2-Ba1 <sup>11</sup>                                                | 180.0             |
| Ba1-Ba2-Ba1 <sup>4</sup>                                                | 90.0              | Ba1-Ba2-Ba1 <sup>7</sup>                                                 | 90.0              | Ba1-Ba2-Ba1 <sup>7</sup>                                                 | 90.0              |
| P1 <sup>10</sup> -Si1-P1                                                | 103.80(4)         | P1 <sup>16</sup> -Si1-P1                                                 | 103.37(10)        | P1 <sup>14</sup> -Si1-P1                                                 | 102.58(5)         |
| P1-Si1-P2                                                               | 109.29(14)        | P1-Si1-P2                                                                | 109.37(3)         | P1-Si1-P2                                                                | 109.60(19)        |
| P2 <sup>14</sup> -Si1-P2                                                | 115.26(6)         | P2 <sup>17</sup> -Si1-P2                                                 | 115.32(14)        | P2 <sup>15</sup> -Si1-P2                                                 | 115.14(7)         |
| P1-Si1-Si1 <sup>10</sup>                                                | 51.90(2)          | P1-Si1-Si1 <sup>16</sup>                                                 | 51.69(5)          | P1-Si1-Si1 <sup>14</sup>                                                 | 51.29(3)          |
| P2-Si1-Si1 <sup>10</sup>                                                | 122.37(3)         | P2-Si1-Si1 <sup>16</sup>                                                 | 122.34(7)         | P2-Si1-Si1 <sup>14</sup>                                                 | 122.43(4)         |
| <b>Ba[Ba<sub>2</sub>Sr<sub>4</sub>S][Si<sub>12</sub>P<sub>20</sub>]</b> |                   | <b>Ba[Ba<sub>2</sub>Sr<sub>4</sub>Se][Si<sub>12</sub>P<sub>20</sub>]</b> |                   | <b>Ba[Ba<sub>2</sub>Sr<sub>4</sub>Te][Si<sub>12</sub>P<sub>20</sub>]</b> |                   |
| Si1-P1-Si2                                                              | 75.61(13)         | Si1-P1-Si2                                                               | 75.68(6)          | Si1-P1-Si2                                                               | 76.41(6)          |
| Si1-P1-Ba1/Sr1                                                          | 97.46(11)         | Si1-P1-Ba1/Sr1                                                           | 97.98(8)          | Si1-P1-Ba1/Sr1                                                           | 98.77(9)          |
| Si2-P1-Ba1/Sr1                                                          | 97.62(12)         | Si2-P1-Ba1/Sr1                                                           | 97.90(9)          | Si2-P1-Ba1/Sr1                                                           | 99.14(9)          |
| Ba1/Sr1 <sup>1</sup> -P1-Ba1/Sr1                                        | 160.87(9)         | Ba1/Sr1-P1-Ba1/Sr1 <sup>10</sup>                                         | 159.86(4)         | Ba1/Sr1-P1-Ba1/Sr1 <sup>11</sup>                                         | 157.14(4)         |
| Ba1/Sr1-P2-Ba1/Sr1 <sup>6</sup>                                         | 78.7(2)           | Ba1/Sr1-P2- Ba1/Sr1 <sup>4</sup>                                         | 78.98(14)         | Ba1/Sr1 <sup>2</sup> -P2-Ba1/Sr1 <sup>1</sup>                            | 79.72(14)         |

|                                               |            |                                                |            |                                                 |           |
|-----------------------------------------------|------------|------------------------------------------------|------------|-------------------------------------------------|-----------|
| Si1-P2-Ba1/Sr1 <sup>6</sup>                   | 161.1(5)   | Si1-P2-Ba1/Sr11 <sup>2</sup>                   | 160.9(3)   | Si1-P2-Ba1/Sr1 <sup>2</sup>                     | 160.5(3)  |
| Si1-P2-Ba1/Sr1                                | 86.7(2)    | Si1-P2-Ba1/Sr11 <sup>4</sup>                   | 86.34(15)  | Si1-P2-Ba1/Sr1 <sup>5</sup>                     | 85.35(14) |
| Si1 <sup>8</sup> -P2-Si1                      | 104.6(5)   | Si1-P2-Si1 <sup>18</sup>                       | 105.0(3)   | Si1-P2-Si1 <sup>8</sup>                         | 106.0(3)  |
| Ba1/Sr1 <sup>5</sup> -P3-Ba1/Sr1 <sup>7</sup> | 76.5(2)    | Ba1/Sr1 <sup>4</sup> -P3- Ba1/Sr1 <sup>1</sup> | 77.82(12)  | Ba1/Sr1 <sup>5</sup> -P3- Ba1/Sr1               | 80.28(14) |
| Si2-P3-Ba1/Sr1 <sup>7</sup>                   | 157.4(5)   | Si2-P3-Ba1/Sr1 <sup>1</sup>                    | 158.8(3)   | Si2 <sup>7</sup> -P3-Ba1/Sr1 <sup>5</sup>       | 161.1(3)  |
| Si2-P3-Ba1/Sr1                                | 85.8(2)    | Si2-P3-Ba1/Sr1                                 | 85.71(14)  | Si2-P3-Ba1/Sr1                                  | 85.35(13) |
| Si2-P3-Si2 <sup>24</sup>                      | 107.1(4)   | Si2 <sup>20</sup> -P3-Si2                      | 106.5(2)   | Si2-P3-Si2 <sup>7</sup>                         | 105.7(3)  |
| Ba1/Sr1-S1-Ba1/Sr1 <sup>2</sup>               | 180.0      | Ba1/Sr1 <sup>1</sup> -Se1-Ba1/Sr1 <sup>2</sup> | 180.0      | Ba1/Sr1 <sup>1</sup> -Te1- Ba1/Sr1 <sup>2</sup> | 180.0     |
| Ba1/Sr1-S1-Ba1/Sr1 <sup>7</sup>               | 90.0       | Ba1/Sr1 <sup>5</sup> -Se1- Ba1/Sr1             | 90.0       | Ba1/Sr1 <sup>1</sup> -Te1- Ba1/Sr1              | 90.0      |
| P1 <sup>2</sup> -Ba1/Sr1-P1 <sup>3</sup>      | 70.1(2)    | P1 <sup>8</sup> -Ba1/Sr1-P1 <sup>7</sup>       | 70.9(2)    | P1 <sup>6</sup> -Ba1/Sr1-P1 <sup>7</sup>        | 72.6(2)   |
| P1 <sup>3</sup> -Ba1/Sr1-P1                   | 70.6(3)    | P1 <sup>7</sup> -Ba1/Sr1-P1                    | 70.8(2)    | P1-Ba1/Sr1-P1 <sup>7</sup>                      | 71.8(2)   |
| P1 <sup>2</sup> -Ba1/Sr1-P1                   | 109.12(8)  | P1 <sup>8</sup> -Ba1/Sr1-P1                    | 110.14(4)  | P1 <sup>8</sup> -Ba1/Sr1-P1 <sup>7</sup>        | 112.86(4) |
| P1-Ba1/Sr1-S1                                 | 125.44(4)  | P1-Ba1/Sr1-Se1                                 | 124.93(2)  | P1-Ba1/Sr1-Te1                                  | 123.57(2) |
| S1-Ba1/Sr1-Ba2                                | 180.0      | Se1-Ba1/Sr1-Ba2                                | 180.0      | Te1-Ba1/Sr1-Ba2                                 | 180.0     |
| P1-Ba1/Sr1-Ba2                                | 54.56(4)   | P1-Ba1/Sr1-Ba2                                 | 55.07(2)   | P1-Ba1/Sr1-Ba2                                  | 56.43(2)  |
| P1 <sup>3</sup> -Ba2-P1 <sup>22</sup>         | 90.0       | P1 <sup>9</sup> -Ba2-P1 <sup>15</sup>          | 90.0       | P1 <sup>7</sup> -Ba2-P1 <sup>15</sup>           | 90.0      |
| P1 <sup>3</sup> -Ba2-P1 <sup>21</sup>         | 120.0      | P1 <sup>7</sup> -Ba2-P1 <sup>10</sup>          | 120.0      | P1 <sup>2</sup> -Ba2-P1 <sup>22</sup>           | 120.0     |
| P1-Si1-P1 <sup>12</sup>                       | 104.6(6)   | P1-Si1-P1 <sup>19</sup>                        | 104.6(3)   | P1-Si1-P1 <sup>13</sup>                         | 102.7(3)  |
| P1-Si1-P2                                     | 108.20(19) | P1-Si1-P2                                      | 108.40(12) | P1-Si1-P2                                       | 109.32(9) |
| P2-Si1-P2 <sup>13</sup>                       | 118.6(8)   | P2-Si1-P2 <sup>19</sup>                        | 117.9(5)   | P2 <sup>13</sup> -Si1-P2                        | 116.0(5)  |
| P1-Si1-Si2                                    | 52.3(3)    | P1-Si1-Si2                                     | 52.28(16)  | P1-Si1-Si2                                      | 51.35(17) |
| P2-Si1-Si2                                    | 120.7(4)   | P2-Si1-Si2                                     | 121.1(2)   | P2-Si1-Si2                                      | 122.0(2)  |
| P1-Si2-P1 <sup>12</sup>                       | 104.2(5)   | P1-Si2-P1 <sup>19</sup>                        | 104.1(3)   | P1-Si2-P1 <sup>13</sup>                         | 104.5(3)  |
| P1-Si2-P3                                     | 109.6(2)   | P1-Si2-P3                                      | 109.29(1)  | P1-Si2-P3                                       | 108.76(1) |
| P3-Si2-P3 <sup>14</sup>                       | 114.0(7)   | P3-Si2-P3 <sup>19</sup>                        | 115.0(4)   | P3-Si2-P3 <sup>13</sup>                         | 116.6(5)  |
| P1-Si2-Si1                                    | 52.1(2)    | P1-Si2-Si1                                     | 52.04(16)  | P1-Si2-Si1                                      | 52.24(16) |
| P3-Si2-Si1                                    | 123.0(4)   | P3-Si2-Si1                                     | 122.5(2)   | P3-Si2-Si1                                      | 121.7(2)  |

---

**Sr[Sr<sub>6</sub>Se][Si<sub>12</sub>P<sub>20</sub>]**

**Sr[Sr<sub>6</sub>Te][Si<sub>12</sub>P<sub>20</sub>]**

---

|                           |          |                           |           |
|---------------------------|----------|---------------------------|-----------|
| Si1 <sup>12</sup> -P1-Si1 | 75.55(8) | Si1 <sup>14</sup> -P1-Si1 | 76.18(6)  |
| Si1-P1-Sr1                | 98.50(2) | Si1-P1-Sr1 <sup>7</sup>   | 99.43(16) |

|                                          |            |                                          |            |
|------------------------------------------|------------|------------------------------------------|------------|
| Si1-P2-Si1 <sup>13</sup>                 | 105.79(6)  | Si1-P2-Si1 <sup>10</sup>                 | 105.72(5)  |
| Sr1 <sup>1</sup> -Se1-Sr1 <sup>2</sup>   | 180.0      | Sr1 <sup>1</sup> -Te1-Sr1                | 180.0      |
| Sr1 <sup>4</sup> -Se1-Sr1                | 90.0       | Sr1 <sup>4</sup> -Te1-Sr1                | 90.0       |
| Sr1 <sup>1</sup> - Sr1- Sr1 <sup>2</sup> | 60.0       | Sr1 <sup>3</sup> - Sr1- Sr1 <sup>2</sup> | 60.0       |
| Sr1 <sup>4</sup> - Sr1- Sr1 <sup>2</sup> | 90.0       | Sr1 <sup>3</sup> - Sr1- Sr1 <sup>4</sup> | 90.0       |
| P1-Sr1-P19                               | 71.55(3)   | P1-Sr1-P1 <sup>10</sup>                  | 72.76(2)   |
| P1 <sup>6</sup> -Sr1-P2 <sup>8</sup>     | 133.77(19) | P1 <sup>9</sup> -Sr1-P2 <sup>6</sup>     | 134.68(14) |
| P1-Sr1-Se1                               | 124.23(3)  | P1-Sr1-Te1                               | 122.99(2)  |
| Se1-Sr1-Sr1 <sup>2</sup>                 | 45.0       | Te1-Ba1-Ba1 <sup>2</sup>                 | 45.0       |
| Sr1 <sup>9</sup> -Sr2-Sr1 <sup>18</sup>  | 180.0      | Sr1 <sup>17</sup> -Sr2-Sr1               | 180.0      |
| Sr1-Sr2-Sr1 <sup>19</sup>                | 90.0       | Sr1 <sup>9</sup> -Sr2-Sr1:               | 90.0       |
| P1 <sup>12</sup> -Si1-P1                 | 104.45(8)  | P1 <sup>16</sup> -Si1-P1                 | 103.82(6)  |
| P1-Si1-P2                                | 108.83(3)  | P1-Si1-P2 <sup>13</sup>                  | 108.94(2)  |
| P2-Si1-P2 <sup>14</sup>                  | 116.41(11) | P2 <sup>15</sup> -Si1-P2 <sup>13</sup>   | 116.53(8)  |
| P1-Si1-Si1 <sup>12</sup>                 | 52.23(4)   | Si1 <sup>14</sup> -Si1-P1                | 51.91(3)   |
| P2-Si1-Si1 <sup>12</sup>                 | 121.79(6)  | Si1 <sup>14</sup> -Si1-P2 <sup>13</sup>  | 121.74(4)  |

**Table S5.** Anisotropic Displacement Parameters ( $\text{\AA}^2 \times 10^3$ ).

The Anisotropic displacement factor exponent takes the form:  $-2\pi^2[h^2a^2U_{11}+2hka*b*U_{12}+\dots]$ .

| Atom                                                       | U <sub>11</sub> | U <sub>22</sub> | U <sub>33</sub> | U <sub>23</sub> | U <sub>13</sub> | U <sub>12</sub> |
|------------------------------------------------------------|-----------------|-----------------|-----------------|-----------------|-----------------|-----------------|
| <b>Ba[Ba<sub>6</sub>S][Si<sub>12</sub>P<sub>20</sub>]</b>  |                 |                 |                 |                 |                 |                 |
| Ba1                                                        | 11.99(16)       | 14.94(12)       | 14.94(12)       | 0               | 0               | 0               |
| Ba2                                                        | 70.8(4)         | 70.8(4)         | 70.8(4)         | 0               | 0               | 0               |
| Si1                                                        | 10.1(2)         | 10.1(2)         | 7.4(4)          | 0               | 0               | 0.4(3)          |
| P1                                                         | 11.8(2)         | 11.8(2)         | 10.0(4)         | 0               | 0               | -2.1(3)         |
| P2                                                         | 9.5(2)          | 9.5(2)          | 9.5(2)          | 0.48(19)        | -0.48(19)       | -0.48(19)       |
| S1                                                         | 12.1(5)         | 12.1(5)         | 12.1(5)         | 0               | 0               | 0               |
| <b>Ba[Ba<sub>6</sub>Se][Si<sub>12</sub>P<sub>20</sub>]</b> |                 |                 |                 |                 |                 |                 |
| Ba1                                                        | 16.6(3)         | 16.6(3)         | 12.5(4)         | 0               | 0               | 0               |

|     |          |          |          |         |        |         |
|-----|----------|----------|----------|---------|--------|---------|
| Ba2 | 84.5(12) | 84.5(12) | 84.5(12) | 0       | 0      | 0       |
| Si1 | 11.8(6)  | 8.3(10)  | 11.8(6)  | 0       | 0.2(7) | 0       |
| P1  | 11.1(6)  | 11.6(9)  | 11.1(6)  | 0       | 2.6(7) | 0       |
| P2  | 10.3(5)  | 10.3(5)  | 10.3(5)  | -0.3(5) | 0.3(5) | -0.3(5) |
| Se1 | 13.2(6)  | 13.2(6)  | 13.2(6)  | 0       | 0      | 0       |

---

**Ba[Ba<sub>6</sub>Te][Si<sub>12</sub>P<sub>20</sub>]**

---

|     |           |           |           |         |         |         |
|-----|-----------|-----------|-----------|---------|---------|---------|
| Ba1 | 17.79(16) | 17.79(16) | 13.2(2)   | 0       | 0       | 0       |
| Ba2 | 115.1(10) | 115.1(10) | 115.1(10) | 0       | 0       | 0       |
| Si1 | 10.8(3)   | 7.8(5)    | 10.8(3)   | 0       | -0.1(4) | 0       |
| P1  | 12.3(3)   | 10.0(5)   | 12.3(3)   | 0       | 2.2(4)  | 0       |
| P2  | 10.4(3)   | 10.4(3)   | 10.4(3)   | -0.5(3) | 0.5(3)  | -0.5(3) |
| Te1 | 16.7(2)   | 16.7(2)   | 16.7(2)   | 0       | 0       | 0       |

---

**Ba[Ba<sub>2</sub>Sr<sub>4</sub>S][Si<sub>12</sub>P<sub>20</sub>]**

---

|         |          |          |          |         |          |          |
|---------|----------|----------|----------|---------|----------|----------|
| Ba1/Sr1 | 25.5(7)  | 21.0(5)  | 21.0(5)  | 2(2)    | 0        | 0        |
| Ba2     | 63.9(9)  | 63.9(9)  | 63.9(9)  | 0       | 0        | 0        |
| Si1     | 12(3)    | 15(6)    | 12(3)    | 0       | -5(4)    | 0        |
| Si2     | 14(3)    | 4(5)     | 14(3)    | 0       | 3(4)     | 0        |
| P1      | 16.4(8)  | 11.0(12) | 16.4(8)  | -4(3)   | -4.2(9)  | -4(3)    |
| P2      | 7(2)     | 7(2)     | 7(2)     | 2.1(19) | -2.1(19) | -2.1(19) |
| P3      | 15(3)    | 15(3)    | 15(3)    | 5(2)    | 5(2)     | -5(2)    |
| S1      | 14.4(15) | 14.4(15) | 14.4(15) | 0       | 0        | 0        |

---

**Ba[Ba<sub>2</sub>Sr<sub>4</sub>Se][Si<sub>12</sub>P<sub>20</sub>]**

---

|         |         |         |         |          |          |          |
|---------|---------|---------|---------|----------|----------|----------|
| Ba1/Sr1 | 19.3(3) | 15.6(3) | 19.3(3) | 0        | -0.2(12) | 0        |
| Ba2     | 51.5(4) | 51.5(4) | 51.5(4) | 0        | 0        | 0        |
| Si1     | 7.4(18) | 7.4(18) | 7(3)    | 0        | 0        | -3(2)    |
| Si2     | 14(2)   | 14(2)   | 7(3)    | 0        | 0        | 2(3)     |
| P1      | 12.8(4) | 12.8(4) | 9.5(6)  | -4.6(18) | -4.6(18) | -3.6(4)  |
| P2      | 9.9(17) | 9.9(17) | 9.9(17) | -2.8(13) | 2.8(13)  | -2.8(13) |
| P3      | 9.1(18) | 9.1(18) | 9.1(18) | -2.9(12) | 2.9(12)  | 2.9(12)  |
| Se1     | 19.2(4) | 19.2(4) | 19.2(4) | 0        | 0        | 0        |

| <b>Ba[Ba<sub>2</sub>Sr<sub>4</sub>Te][Si<sub>12</sub>P<sub>20</sub>]</b> |          |          |         |         |          |          |
|--------------------------------------------------------------------------|----------|----------|---------|---------|----------|----------|
| Ba1/Sr1                                                                  | 17.4(3)  | 21.3(3)  | 21.3(3) | 4.9(12) | 0        | 0        |
| Ba2                                                                      | 59.7(5)  | 59.7(5)  | 59.7(5) | 0       | 0        | 0        |
| Si1                                                                      | 11.9(17) | 11.9(17) | 10(3)   | 0       | 0        | -7(3)    |
| Si2                                                                      | 8.0(16)  | 8.0(16)  | 2(3)    | 0       | 0        | 4(2)     |
| P1                                                                       | 12.7(4)  | 12.7(4)  | 7.7(6)  | 2.4(17) | 2.4(17)  | -4.9(4)  |
| P2                                                                       | 9.0(14)  | 9.0(14)  | 9.0(14) | 0.2(17) | -0.2(17) | 0.2(17)  |
| P3                                                                       | 8.8(14)  | 8.8(14)  | 8.8(14) | 0.3(18) | -0.3(18) | -0.3(18) |
| Te1                                                                      | 22.7(3)  | 22.7(3)  | 22.7(3) | 0       | 0        | 0        |
| <b>Sr[Sr<sub>6</sub>Se][Si<sub>12</sub>P<sub>20</sub>]</b>               |          |          |         |         |          |          |
| Sr1                                                                      | 35.7(4)  | 38.6(5)  | 35.7(4) | 0       | 0        | 0        |
| Sr2                                                                      | 235(5)   | 235(5)   | 235(5)  | 0       | 0        | 0        |
| Si1                                                                      | 26.6(5)  | 26.6(5)  | 22.2(7) | 0       | 0        | -0.7(6)  |
| P1                                                                       | 28.9(5)  | 28.9(5)  | 24.1(7) | 0       | 0        | -3.6(6)  |
| P2                                                                       | 25.9(4)  | 25.9(4)  | 25.9(4) | -0.2(4) | 0.2(4)   | -0.2(4)  |
| Se1                                                                      | 27.8(5)  | 27.8(5)  | 27.8(5) | 0       | 0        | 0        |
| <b>Sr[Sr<sub>6</sub>Te][Si<sub>12</sub>P<sub>20</sub>]</b>               |          |          |         |         |          |          |
| Sr1                                                                      | 23.3(3)  | 20.1(4)  | 23.3(3) | -0      | -0       | 0        |
| Sr2                                                                      | 189(4)   | 189(4)   | 189(4)  | -0      | -0       | 0        |
| Si1                                                                      | 8.4(6)   | 13.8(4)  | 13.8(4) | -0      | -0       | -0.1(5)  |
| P1                                                                       | 11.0(6)  | 15.8(4)  | 15.8(4) | -0      | -0       | -2.5(5)  |
| P2                                                                       | 12.8(3)  | 12.8(3)  | 12.8(3) | -0.3(4) | 0.3(4)   | -0.3(4)  |
| Te1                                                                      | 16.1(3)  | 16.1(3)  | 16.1(3) | -0      | -0       | 0        |

**Table S6.** Crystallographic information of compounds containing six-coordinated [A<sub>6</sub>Q]/[A<sub>6</sub>X] ionic group.

| Compounds                                                                                                                                                                                    | Space Group               | Symmetry | Cell Parameters                | Reference |
|----------------------------------------------------------------------------------------------------------------------------------------------------------------------------------------------|---------------------------|----------|--------------------------------|-----------|
| [(Cs <sub>6</sub> F)(Cs <sub>3</sub> AgF)][Ge <sub>14</sub> O <sub>32</sub> ]                                                                                                                | <i>F</i> $\bar{4}3m$      | NCS      | 15.51 15.51 15.51 90 90 90     | 19        |
| [(Cs <sub>6</sub> F)(Cs <sub>3</sub> AgF)][Ge <sub>12</sub> Mn <sub>2</sub> O <sub>32</sub> ]                                                                                                | <i>F</i> $\bar{4}3m$      | NCS      | 15.52 15.52 15.52 90 90 90     | 20        |
| [(Rb <sub>6</sub> F)(Rb <sub>4</sub> F)][Ge <sub>14</sub> O <sub>32</sub> ]                                                                                                                  | <i>F</i> $\bar{4}3m$      | NCS      | 15.35 15.35 15.35 90 90 90     | 21        |
| [(Rb <sub>6</sub> F)(Rb <sub>3.1</sub> Co <sub>0.9</sub> F <sub>0.96</sub> )] [Co <sub>3.8</sub> Ge <sub>10.2</sub> O <sub>30</sub> F <sub>2</sub> ]                                         | <i>F</i> $\bar{4}3m$      | NCS      | 15.27 15.27 15.27 90 90 90     | 21        |
| Na[K <sub>6</sub> F][(UO <sub>2</sub> ) <sub>3</sub> (Si <sub>2</sub> O <sub>7</sub> ) <sub>2</sub> ]                                                                                        | <i>Pn</i> <i>nm</i>       | CS       | 11.08 12.11 7.84 90 90 90      | 22        |
| K[K <sub>6</sub> Cl][(UO <sub>2</sub> ) <sub>3</sub> (Si <sub>2</sub> O <sub>7</sub> ) <sub>2</sub> ]                                                                                        | <i>Pn</i> <i>nm</i>       | CS       | 11.08 13.58 7.87 90 90 90      | 22        |
| Na[Rb <sub>6</sub> F][(UO <sub>2</sub> ) <sub>3</sub> (Si <sub>2</sub> O <sub>7</sub> ) <sub>2</sub> ]                                                                                       | <i>Pn</i> <i>nm</i>       | CS       | 11.14 13.51 7.89 90 90 90      | 22        |
| K[K <sub>6</sub> Cl][(UO <sub>2</sub> ) <sub>3</sub> (Ge <sub>2</sub> O <sub>7</sub> ) <sub>2</sub> ]                                                                                        | <i>Pn</i> <i>nm</i>       | CS       | 11.38 13.72 8.05 90 90 90      | 23        |
| K[K <sub>6</sub> Br <sub>0.6</sub> F <sub>0.4</sub> ][(UO <sub>2</sub> ) <sub>3</sub> (Ge <sub>2</sub> O <sub>7</sub> ) <sub>2</sub> ]                                                       | <i>Pn</i> <i>nm</i>       | CS       | 11.39 13.76 8.06 90 90 90      | 23        |
| Na <sub>0.9</sub> Rb <sub>0.1</sub> [Rb <sub>6</sub> F][(UO <sub>2</sub> ) <sub>3</sub> (Ge <sub>2</sub> O <sub>7</sub> ) <sub>2</sub> ]                                                     | <i>Pn</i> <i>nm</i>       | CS       | 11.40 13.67 8.09 90 90 90      | 23        |
| K <sub>0.6</sub> Na <sub>0.4</sub> [K <sub>5</sub> CsCl <sub>0.5</sub> F <sub>0.5</sub> ][(UO <sub>2</sub> ) <sub>3</sub> (Ge <sub>2</sub> O <sub>7</sub> ) <sub>2</sub> ]                   | <i>Pn</i> <i>nm</i>       | CS       | 11.40 13.77 8.01 90 90 90      | 23        |
| K <sub>0.8</sub> Na <sub>0.2</sub> [K <sub>4.8</sub> Cs <sub>1.2</sub> Cl <sub>0.5</sub> F <sub>0.5</sub> ][(UO <sub>2</sub> ) <sub>3</sub> (Ge <sub>2</sub> O <sub>7</sub> ) <sub>2</sub> ] | <i>Pmn</i> 2 <sub>1</sub> | CS       | 11.43 13.83 7.99 90 90 90      | 23        |
| K[K <sub>1.8</sub> Cs <sub>4.2</sub> F][(UO <sub>2</sub> ) <sub>3</sub> (Ge <sub>2</sub> O <sub>7</sub> ) <sub>2</sub> ]                                                                     | <i>Cmc</i> 2 <sub>1</sub> | CS       | 22.88 14.28 7.99 90 90 90      | 23        |
| [Cs <sub>6</sub> Cl][Ga <sub>5</sub> GeS <sub>12</sub> ]                                                                                                                                     | <i>R</i> $\bar{3}m$       | CS       | 11.47 11.47 20.04 90 90 120    | 24        |
| [Cs <sub>6</sub> Cl][Ga <sub>5</sub> GeSe <sub>12</sub> ]                                                                                                                                    | <i>R</i> $\bar{3}m$       | CS       | 11.87 11.87 20.38 90 90 120    | 24        |
| Na[Cs <sub>6</sub> F][Ga <sub>6</sub> S <sub>12</sub> ]                                                                                                                                      | <i>R</i> $\bar{3}m$       | CS       | 11.38 11.38 19.29 90 90 120    | 25        |
| Na[Cs <sub>6</sub> Cl][Ga <sub>6</sub> S <sub>12</sub> ]                                                                                                                                     | <i>R</i> $\bar{3}m$       | CS       | 11.49 11.49 19.74 90 90 120    | 25        |
| K[Cs <sub>5.57</sub> K <sub>0.43</sub> Cl][Ga <sub>6</sub> S <sub>12</sub> ]                                                                                                                 | <i>R</i> $\bar{3}m$       | CS       | 11.62 11.62 19.90 90 90 120    | 25        |
| Rb[Cs <sub>5.39</sub> Rb <sub>0.61</sub> Cl][Ga <sub>6</sub> S <sub>12</sub> ]                                                                                                               | <i>R</i> $\bar{3}m$       | CS       | 11.73 11.73 20.00 90 90 120    | 25        |
| Na[Cs <sub>5.69</sub> Na <sub>1.31</sub> Br][Ga <sub>6</sub> S <sub>12</sub> ]                                                                                                               | <i>R</i> $\bar{3}m$       | CS       | 11.51 11.51 19.86 90 90 120    | 25        |
| K[Cs <sub>5.23</sub> K <sub>1.77</sub> Br][Ga <sub>6</sub> S <sub>12</sub> ]                                                                                                                 | <i>R</i> $\bar{3}m$       | CS       | 11.64 11.64 19.97 90 90 120    | 25        |
| Rb[Cs <sub>4.92</sub> Rb <sub>1.08</sub> Br][Ga <sub>6</sub> S <sub>12</sub> ]                                                                                                               | <i>R</i> $\bar{3}m$       | CS       | 11.76 11.76 20.10 90 90 120    | 25        |
| Na[Cs <sub>6</sub> Cl][Ga <sub>6</sub> Se <sub>12</sub> ]                                                                                                                                    | <i>R</i> $\bar{3}m$       | CS       | 11.93 11.93 20.23 90 90 120    | 25        |
| K[Cs <sub>5.74</sub> K <sub>0.26</sub> Cl][Ga <sub>6</sub> Se <sub>12</sub> ]                                                                                                                | <i>R</i> $\bar{3}m$       | CS       | 12.07 12.07 20.47 90 90 120    | 25        |
| Na[Cs <sub>6</sub> Br][Ga <sub>6</sub> Se <sub>12</sub> ]                                                                                                                                    | <i>R</i> $\bar{3}m$       | CS       | 11.97 11.97 20.40 90 90 120    | 25        |
| Rb[Cs <sub>4.48</sub> Rb <sub>0.52</sub> Br][Ga <sub>6</sub> Se <sub>12</sub> ]                                                                                                              | <i>R</i> $\bar{3}m$       | CS       | 11.93 11.93 20.22 90 90 120    | 25        |
| K[Cs <sub>5.58</sub> K <sub>0.42</sub> Br][Ga <sub>6</sub> Se <sub>12</sub> ]                                                                                                                | <i>R</i> $\bar{3}m$       | CS       | 12.11 12.11 20.61 90 90 120    | 25        |
| [Cs <sub>6</sub> Cl][Ho <sub>21</sub> S <sub>34</sub> ]                                                                                                                                      | <i>C</i> 2/ <i>m</i>      | CS       | 17.13 19.49 12.99 90 128.67 90 | 26        |

|                                                                                                                                          |                                |     |       |       |       |    |        |     |    |
|------------------------------------------------------------------------------------------------------------------------------------------|--------------------------------|-----|-------|-------|-------|----|--------|-----|----|
| [Cs <sub>6</sub> Cl][Ho <sub>21</sub> Se <sub>34</sub> ]                                                                                 | <i>C2/m</i>                    | CS  | 17.67 | 20.18 | 13.42 | 90 | 128.61 | 90  | 26 |
| [Cs <sub>6</sub> Cl][Ho <sub>21</sub> Te <sub>34</sub> ]                                                                                 | <i>C2/m</i>                    | CS  | 18.78 | 21.49 | 14.30 | 90 | 128.63 | 90  | 26 |
| [Cs <sub>6</sub> Cl][Dy <sub>21</sub> Se <sub>34</sub> ]                                                                                 | <i>C2/m</i>                    | CS  | 17.17 | 19.53 | 13.02 | 90 | 128.74 | 90  | 26 |
| [Cs <sub>6</sub> Cl][Dy <sub>21</sub> Te <sub>34</sub> ]                                                                                 | <i>C2/m</i>                    | CS  | 18.87 | 21.58 | 14.36 | 90 | 128.66 | 90  | 26 |
| Cs <sub>3</sub> [Cs <sub>6</sub> Cl] <sub>6</sub> [Ga <sub>53</sub> Se <sub>96</sub> ]                                                   | <i>R<math>\bar{3}m</math></i>  | CS  | 11.99 | 11.99 | 50.01 | 90 | 90     | 120 | 27 |
| Cs <sub>5</sub> [Cs <sub>6</sub> Cl] <sub>2</sub> [Ga <sub>15</sub> Ge <sub>9</sub> Se <sub>48</sub> ]                                   | <i>I4/m</i>                    | CS  | 14.39 | 14.39 | 28.01 | 90 | 90     | 90  | 28 |
| Cs <sub>5</sub> [Cs <sub>6</sub> Br] <sub>2</sub> [Ga <sub>15</sub> Ge <sub>9</sub> Se <sub>48</sub> ]                                   | <i>I4/m</i>                    | CS  | 14.38 | 14.38 | 27.93 | 90 | 90     | 90  | 28 |
| Cs <sub>5</sub> [Cs <sub>6</sub> Cl <sub>0.6</sub> Cl <sub>0.4</sub> ] <sub>2</sub> [Ga <sub>15</sub> Ge <sub>9</sub> Se <sub>48</sub> ] | <i>I4/m</i>                    | CS  | 14.43 | 14.43 | 28.08 | 90 | 90     | 90  | 28 |
| Cs <sub>5</sub> [Rb <sub>6</sub> Cl] <sub>2</sub> [Ga <sub>15</sub> Ge <sub>9</sub> Se <sub>48</sub> ]                                   | <i>I4/m</i>                    | CS  | 14.22 | 14.22 | 27.41 | 90 | 90     | 90  | 28 |
| Cs <sub>5</sub> [Cs <sub>5</sub> KCl] <sub>2</sub> [Ga <sub>15</sub> Ge <sub>9</sub> Se <sub>48</sub> ]                                  | <i>I4/m</i>                    | CS  | 14.33 | 14.33 | 27.80 | 90 | 90     | 90  | 28 |
| Cs <sub>5</sub> [Rb <sub>6</sub> Rb] <sub>2</sub> [Ga <sub>15</sub> Ge <sub>9</sub> Se <sub>48</sub> ]                                   | <i>I4/m</i>                    | CS  | 14.30 | 14.30 | 27.60 | 90 | 90     | 90  | 28 |
| Li[K <sub>6</sub> Cl][Fe <sub>24</sub> S <sub>26</sub> ]                                                                                 | <i>Pm<math>\bar{3}m</math></i> | CS  | 10.36 | 10.36 | 10.36 | 90 | 90     | 90  | 29 |
| [Cs <sub>6</sub> Cl][Fe <sub>24</sub> Se <sub>26</sub> ]                                                                                 | <i>I4/mmm</i>                  | CS  | 11.09 | 11.09 | 22.14 | 90 | 90     | 90  | 30 |
| Fe[Ba <sub>6</sub> S][Cu <sub>12</sub> Fe <sub>12</sub> S <sub>26</sub> ]                                                                | <i>Pm<math>\bar{3}m</math></i> | CS  | 10.38 | 10.38 | 10.38 | 90 | 90     | 90  | 31 |
| Cs <sub>5</sub> [Cs <sub>6</sub> O][Fe <sub>5</sub> S <sub>8</sub> ] <sub>2</sub>                                                        | <i>I4/mmm</i>                  | CS  | 11.99 | 11.99 | 14.11 | 90 | 90     | 90  | 32 |
| Cs[Ba <sub>6</sub> Cl][Si <sub>12</sub> P <sub>20</sub> ]                                                                                | <i>Fm<math>\bar{3}m</math></i> | CS  | 15.78 | 15.78 | 15.78 | 90 | 90     | 90  | 33 |
| Cs[Ba <sub>6</sub> Br][Si <sub>12</sub> P <sub>20</sub> ]                                                                                | <i>Fm<math>\bar{3}m</math></i> | CS  | 15.82 | 15.82 | 15.82 | 90 | 90     | 90  | 33 |
| Cs[Ba <sub>6</sub> I][Si <sub>12</sub> P <sub>20</sub> ]                                                                                 | <i>Fm<math>\bar{3}m</math></i> | CS  | 15.86 | 15.86 | 15.86 | 90 | 90     | 90  | 33 |
| Rb[Ba <sub>6</sub> Cl][Si <sub>12</sub> P <sub>20</sub> ]                                                                                | <i>Fm<math>\bar{3}m</math></i> | CS  | 15.76 | 15.76 | 15.76 | 90 | 90     | 90  | 33 |
| Rb[Ba <sub>6</sub> Br][Si <sub>12</sub> P <sub>20</sub> ]                                                                                | <i>Fm<math>\bar{3}m</math></i> | CS  | 15.80 | 15.80 | 15.80 | 90 | 90     | 90  | 33 |
| Rb[Ba <sub>6</sub> I][Si <sub>12</sub> P <sub>20</sub> ]                                                                                 | <i>Fm<math>\bar{3}m</math></i> | CS  | 15.86 | 15.86 | 15.86 | 90 | 90     | 90  | 33 |
| K[Ba <sub>6</sub> Cl][Si <sub>12</sub> P <sub>20</sub> ]                                                                                 | <i>Fm<math>\bar{3}m</math></i> | CS  | 15.73 | 15.73 | 15.73 | 90 | 90     | 90  | 33 |
| Na[Ba <sub>6</sub> Cl][Si <sub>12</sub> P <sub>20</sub> ]                                                                                | <i>Fm<math>\bar{3}m</math></i> | CS  | 15.67 | 15.67 | 15.67 | 90 | 90     | 90  | 33 |
| Cs[Sr <sub>6</sub> Cl][Si <sub>12</sub> P <sub>20</sub> ]                                                                                | <i>Fm<math>\bar{3}m</math></i> | CS  | 15.64 | 15.64 | 15.64 | 90 | 90     | 90  | 33 |
| Cs[Sr <sub>6</sub> Br][Si <sub>12</sub> P <sub>20</sub> ]                                                                                | <i>Fm<math>\bar{3}m</math></i> | CS  | 15.67 | 15.67 | 15.67 | 90 | 90     | 90  | 33 |
| Rb[Sr <sub>6</sub> Br][Si <sub>12</sub> P <sub>20</sub> ]                                                                                | <i>Fm<math>\bar{3}m</math></i> | CS  | 15.63 | 15.63 | 15.63 | 90 | 90     | 90  | 33 |
| [Ba <sub>4</sub> (Ba <sub>6</sub> Cl <sub>2</sub> )][(VO <sub>4</sub> ) <sub>6</sub> ]                                                   | <i>P6<sub>3</sub>/m</i>        | CS  | 10.56 | 10.56 | 7.76  | 90 | 90     | 120 | 34 |
| Ba <sub>4</sub> [Ba <sub>6</sub> S] [(VO <sub>3</sub> S) <sub>6</sub> ]                                                                  | <i>P6<sub>3</sub></i>          | NCS | 18.41 | 18.41 | 8.63  | 90 | 90     | 120 | 35 |
| Ba <sub>4</sub> [Ba <sub>6</sub> S] [(V <sub>6</sub> O <sub>2.78</sub> S <sub>1.22</sub> ) <sub>6</sub> ]                                | <i>P6<sub>3</sub></i>          | NCS | 18.32 | 18.32 | 8.60  | 90 | 90     | 120 | 35 |

**Table S7.** Average coordination number (ACN) of Ba/Sr-Si-P and A-M-Pn-X series compounds. (Calculated by the covalent coordination number of P atom in a single cell, the coplanar weight of P atom is 0.5, the common edge weight is 0.25, and the common vertex weight is 0.125.)

| Compounds                                                                                                                               | Band gap (eV) | ACN  | Calculation process (The red is the covalent coordination number of P atom)                                                                                              |
|-----------------------------------------------------------------------------------------------------------------------------------------|---------------|------|--------------------------------------------------------------------------------------------------------------------------------------------------------------------------|
| A[A <sub>6</sub> Ch][Si <sub>12</sub> P <sub>20</sub> ]                                                                                 | 1.91-2.27     | 2.40 | $(24 \times 2 + 48 \times 0.5 \times 2 + 32 \times 3) / 24 + 48 \times 0.5 + 32 = 192 / 80$                                                                              |
| BaSi <sub>7</sub> P <sub>10</sub> <sup>36</sup>                                                                                         | 1.48          | 2.80 | $(2 \times 2 + 8 \times 0.125 \times 3 + 7 \times 3) / 2 + 8 \times 0.125 + 1 = 28 / 10$                                                                                 |
| SrSi <sub>7</sub> P <sub>10</sub> <sup>36</sup>                                                                                         | 1.51          |      |                                                                                                                                                                          |
| Ba <sub>2</sub> Si <sub>3</sub> P <sub>6</sub> (exist P-P bond) <sup>37</sup>                                                           | 1.88          | 2.42 | $(13 \times 2 + 4 \times 0.5 \times 2 + 4 \times 0.25 \times 2 + 6 \times 3 + 4 \times 0.5 \times 3) / (13 + 4 \times 0.5 + 4 \times 0.25 + 6 + 4 \times 0.5) = 58 / 24$ |
| Ba <sub>2</sub> SiP <sub>4</sub> (exist P-P bond) <sup>38</sup>                                                                         | 1.45          | 2.00 | $(16 \times 2) / 16 = 32 / 16$                                                                                                                                           |
| Sr <sub>2</sub> SiP <sub>4</sub> (exist P-P bond) <sup>38</sup>                                                                         | 1.41          |      |                                                                                                                                                                          |
| [Sr <sub>4</sub> Br] <sub>2</sub> [Mg <sub>3</sub> Si <sub>25</sub> P <sub>40</sub> ] <sup>39</sup>                                     | 1.90          | 2.8  | $(8 \times 2 + 32 \times 3) / 40 = 112 / 40$                                                                                                                             |
| [Sr <sub>4</sub> Br] <sub>2</sub> [Cd <sub>3</sub> Si <sub>25</sub> P <sub>40</sub> ] <sup>39</sup>                                     | 1.83          |      |                                                                                                                                                                          |
| [Ba <sub>3</sub> Br][GaSi <sub>10</sub> P <sub>16</sub> ] <sup>39</sup>                                                                 | 1.86          | 2.75 | $(16 \times 2 + 46 \times 3 + 4 \times 0.5 \times 3) / (16 + 46 + 4 \times 0.5) = 176 / 64$                                                                              |
| [Ba <sub>3</sub> Br][InSi <sub>10</sub> P <sub>16</sub> ] <sup>39</sup>                                                                 | 1.81          |      |                                                                                                                                                                          |
| [Sr <sub>4</sub> Br][In <sub>2</sub> Si <sub>11</sub> P <sub>19</sub> ] <sup>40</sup>                                                   | 1.87          | 2.68 | $(5 \times 2 + 1 \times 0.5 \times 2 + 10 \times 3 + 3 \times 0.5 \times 3 + 1 \times 4) / (5 + 0.5 \times 2 + 10 + 3 \times 0.5 + 1) = 49.5 / 18.5$                     |
| [Ba <sub>2</sub> Sr <sub>4</sub> Br <sub>2</sub> ][Sr <sub>4</sub> Br][In <sub>5</sub> Si <sub>31</sub> P <sub>52</sub> ] <sup>40</sup> | 1.70          | 2.77 | $(24 \times 2 + 80 \times 3) / 104 = 288 / 104$                                                                                                                          |

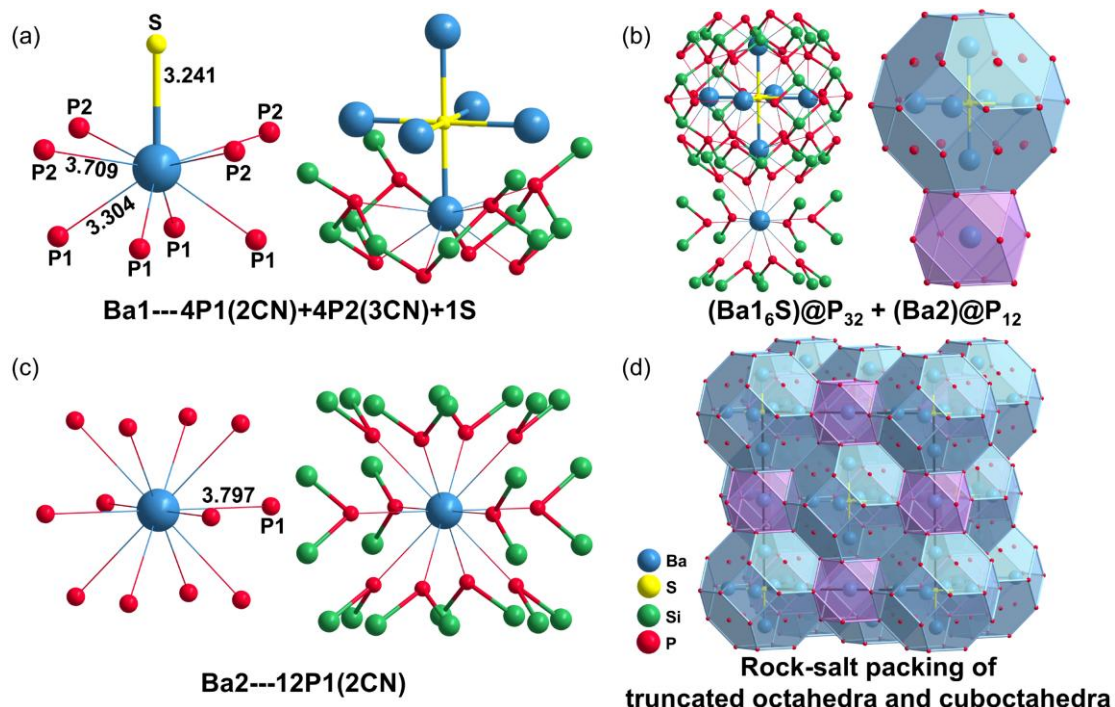

**Figure S1. Coordination environments of Ba1 and Ba2 atoms in  $\text{Ba}[\text{Ba}_6\text{S}][\text{Si}_{12}\text{P}_{20}]$ .** (a) Coordination environment of Ba1. (b) Coordination environment of Ba2. (c) Truncated octahedron  $(\text{Ba1}_6\text{S})@P_{32}$  and cuboctahedron  $(\text{Ba2})@P_{12}$ . (d) Rock-salt sublattice packing in  $\text{Ba}[\text{Ba}_6\text{S}][\text{Si}_{12}\text{P}_{20}]$ .

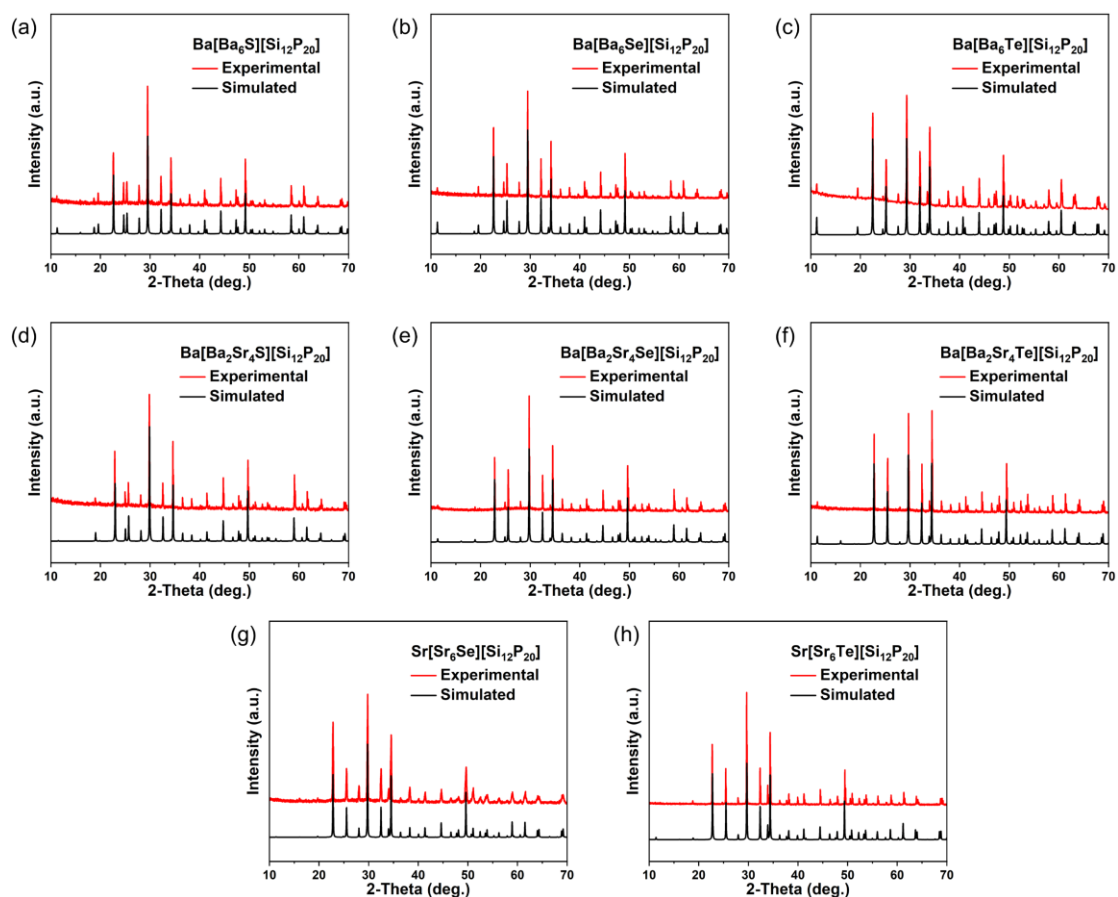

**Figure S2. Powder XRD patterns.** Powder XRD patterns of the experimental and simulated for  $\text{Ba}[\text{Ba}_6\text{S}][\text{Si}_{12}\text{P}_{20}]$  (a),  $\text{Ba}[\text{Ba}_6\text{Se}][\text{Si}_{12}\text{P}_{20}]$  (b),  $\text{Ba}[\text{Ba}_6\text{Te}][\text{Si}_{12}\text{P}_{20}]$  (c),  $\text{Ba}[\text{Ba}_2\text{Sr}_4\text{S}][\text{Si}_{12}\text{P}_{20}]$  (d),  $\text{Ba}[\text{Ba}_2\text{Sr}_4\text{Se}][\text{Si}_{12}\text{P}_{20}]$  (e),  $\text{Ba}[\text{Ba}_2\text{Sr}_4\text{Te}][\text{Si}_{12}\text{P}_{20}]$  (f),  $\text{Sr}[\text{Sr}_6\text{Se}][\text{Si}_{12}\text{P}_{20}]$  (g) and  $\text{Sr}[\text{Sr}_6\text{Te}][\text{Si}_{12}\text{P}_{20}]$  (h).

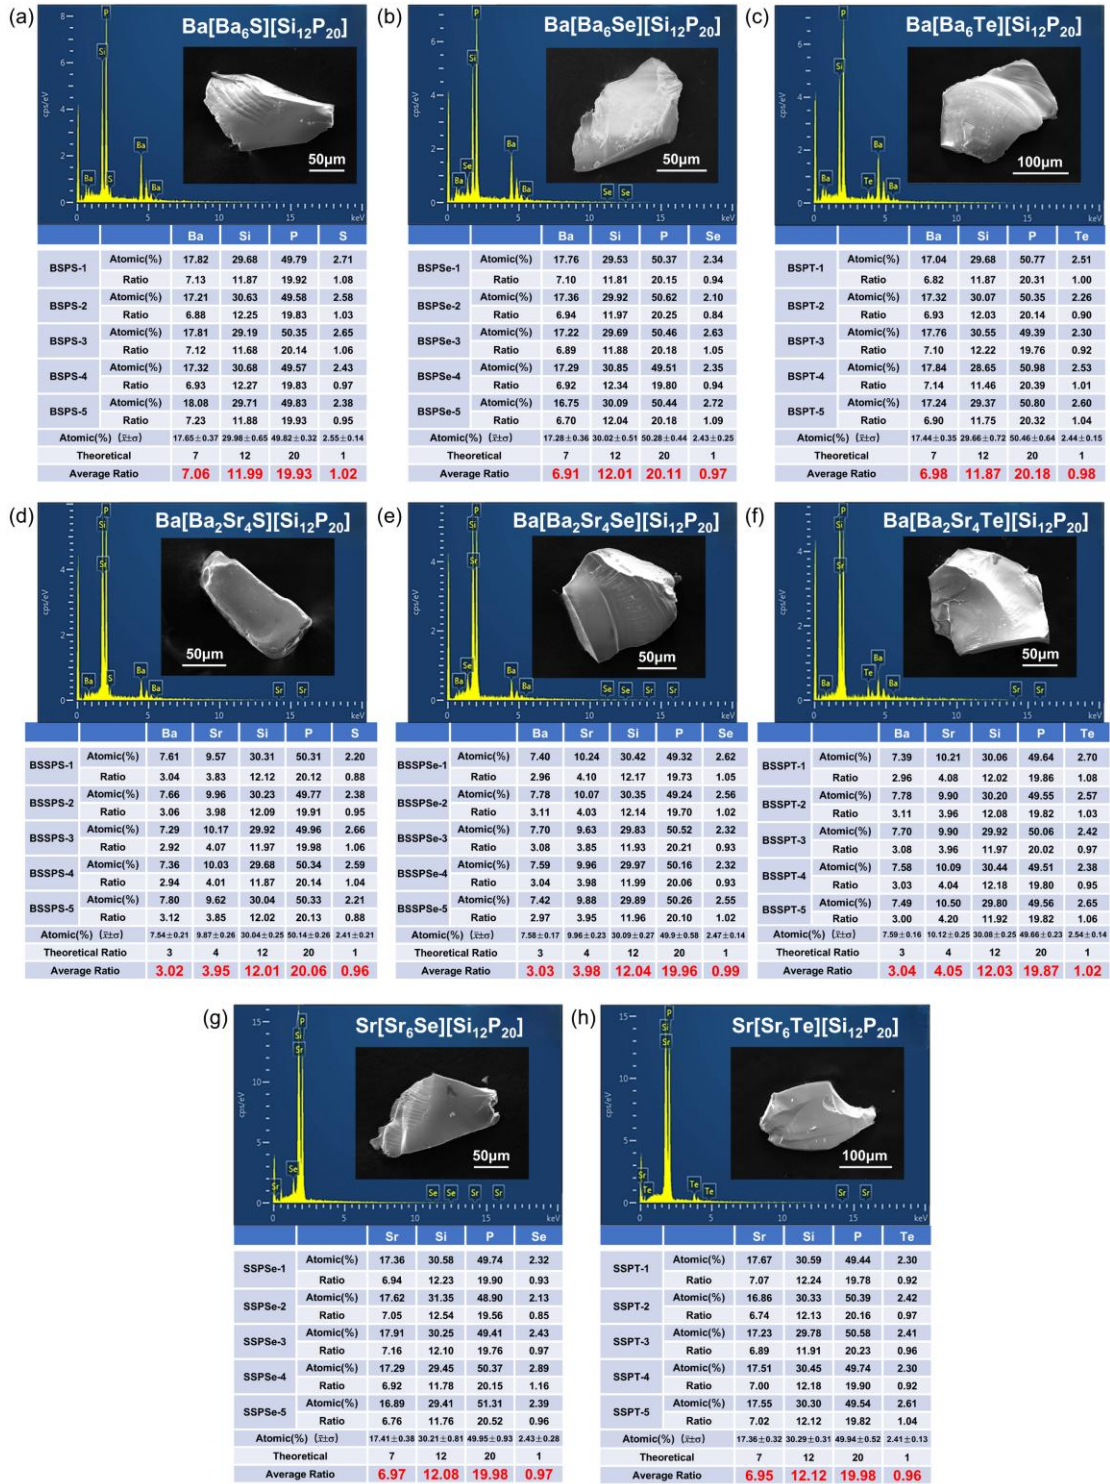

**Figure S3. Energy-dispersive X-ray spectroscopy (EDS) analysis.** EDS spectra of Ba[Ba<sub>6</sub>S][Si<sub>12</sub>P<sub>20</sub>] (a), Ba[Ba<sub>6</sub>Se][Si<sub>12</sub>P<sub>20</sub>] (b), Ba[Ba<sub>6</sub>Te][Si<sub>12</sub>P<sub>20</sub>] (c), Ba[Ba<sub>2</sub>Sr<sub>4</sub>S][Si<sub>12</sub>P<sub>20</sub>] (d), Ba[Ba<sub>2</sub>Sr<sub>4</sub>Se][Si<sub>12</sub>P<sub>20</sub>] (e), Ba[Ba<sub>2</sub>Sr<sub>4</sub>Te][Si<sub>12</sub>P<sub>20</sub>] (f), Sr[Sr<sub>6</sub>Se][Si<sub>12</sub>P<sub>20</sub>] (g) and Sr[Sr<sub>6</sub>Te][Si<sub>12</sub>P<sub>20</sub>] (h).

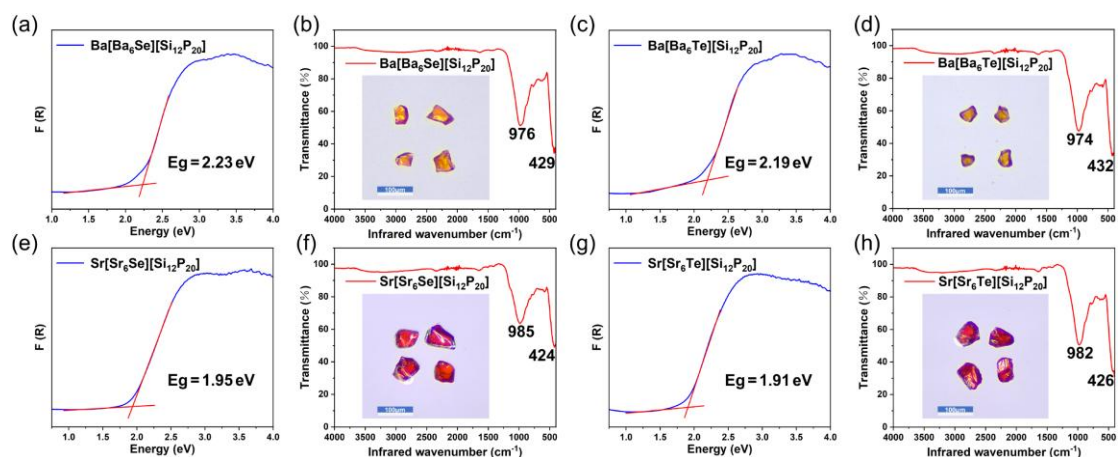

**Figure S4. Optical properties.** (a, c, e and g) UV-Vis-NIR diffuse reflectance spectra and band gap values. (b, d, f and h) IR ATR transmission spectra and corresponding crystal crystal photos (inset b, d, f and h).

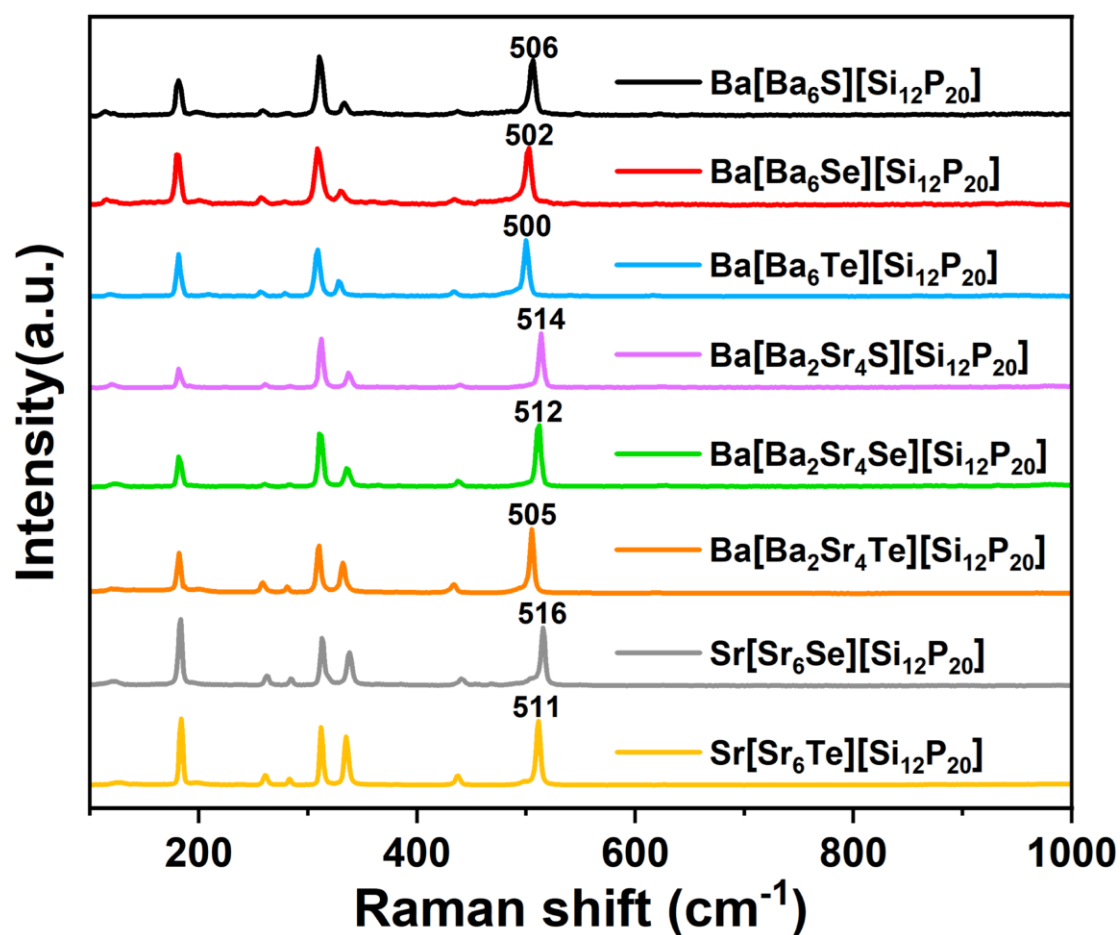

**Figure S5. Raman scattering spectra.** Raman scattering spectra of Ba[Ba<sub>6</sub>S][Si<sub>12</sub>P<sub>20</sub>], Ba[Ba<sub>6</sub>Se][Si<sub>12</sub>P<sub>20</sub>], Ba[Ba<sub>6</sub>Te][Si<sub>12</sub>P<sub>20</sub>], Ba[Ba<sub>2</sub>Sr<sub>4</sub>S][Si<sub>12</sub>P<sub>20</sub>], Ba[Ba<sub>2</sub>Sr<sub>4</sub>Se][Si<sub>12</sub>P<sub>20</sub>], Ba[Ba<sub>2</sub>Sr<sub>4</sub>Te][Si<sub>12</sub>P<sub>20</sub>], Sr[Sr<sub>6</sub>Se][Si<sub>12</sub>P<sub>20</sub>] and Sr[Sr<sub>6</sub>Te][Si<sub>12</sub>P<sub>20</sub>].

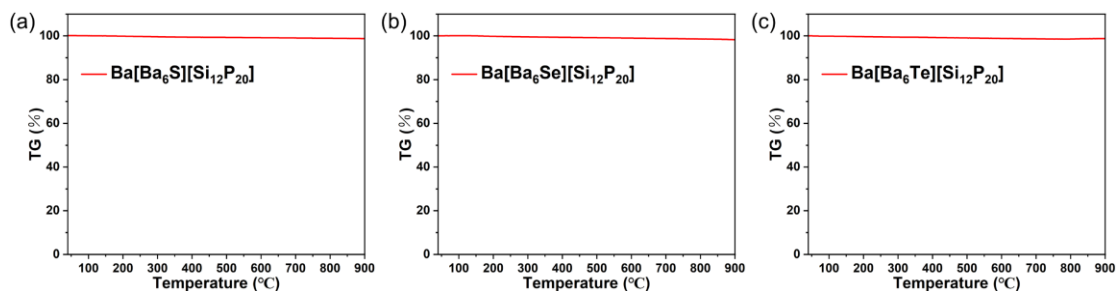

**Figure S6. TG curves.** TG curves of Ba[Ba<sub>6</sub>S][Si<sub>12</sub>P<sub>20</sub>] (a), Ba[Ba<sub>6</sub>Se][Si<sub>12</sub>P<sub>20</sub>] (b) and Ba[Ba<sub>6</sub>Te][Si<sub>12</sub>P<sub>20</sub>] (c).

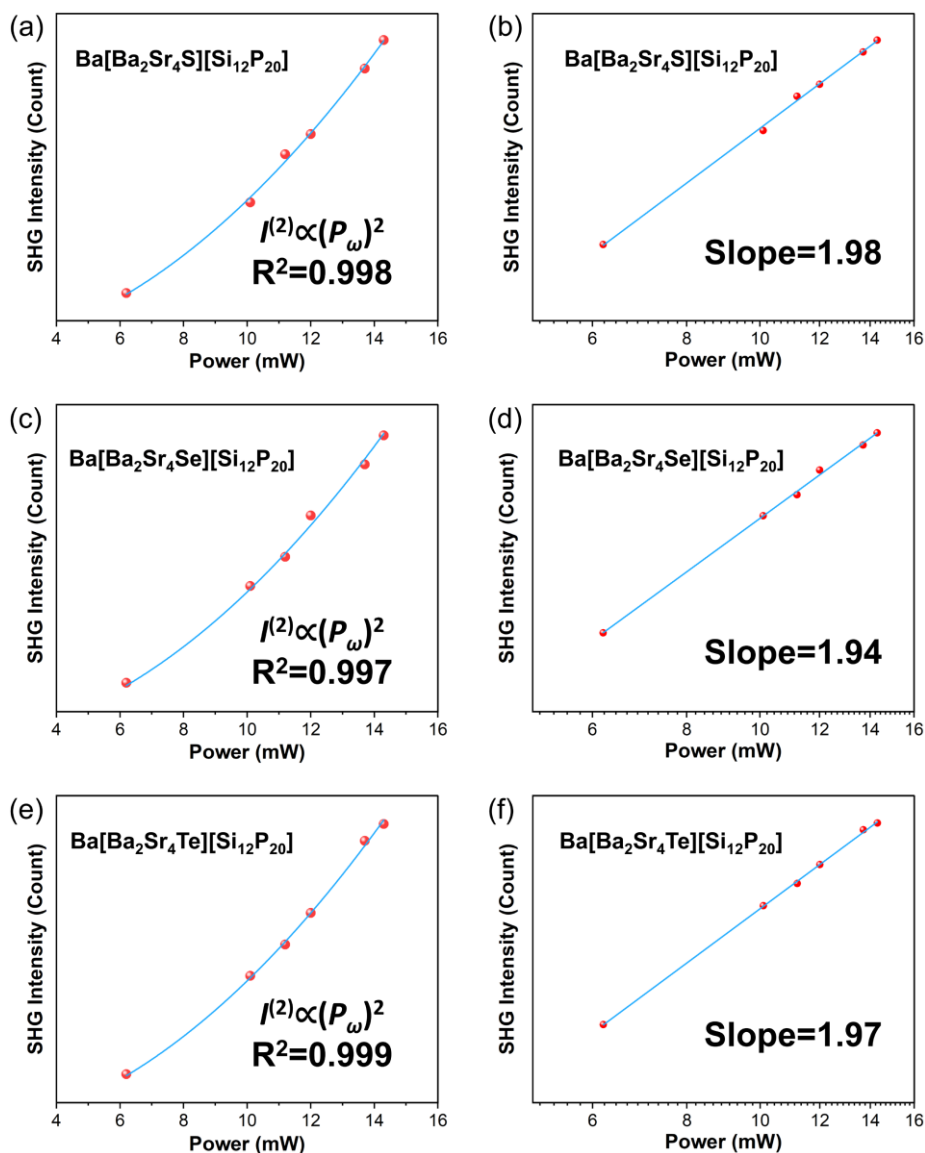

**Figure S7. Power-dependent SHG measurements** (a, c, e) Linear-scale plots of SHG intensity as a function of incident laser power for Ba[Ba<sub>2</sub>Sr<sub>4</sub>S][Si<sub>12</sub>P<sub>20</sub>], Ba[Ba<sub>2</sub>Sr<sub>4</sub>Se][Si<sub>12</sub>P<sub>20</sub>], and Ba[Ba<sub>2</sub>Sr<sub>4</sub>Te][Si<sub>12</sub>P<sub>20</sub>], respectively; (b, d, f) the corresponding double-logarithmic plots.

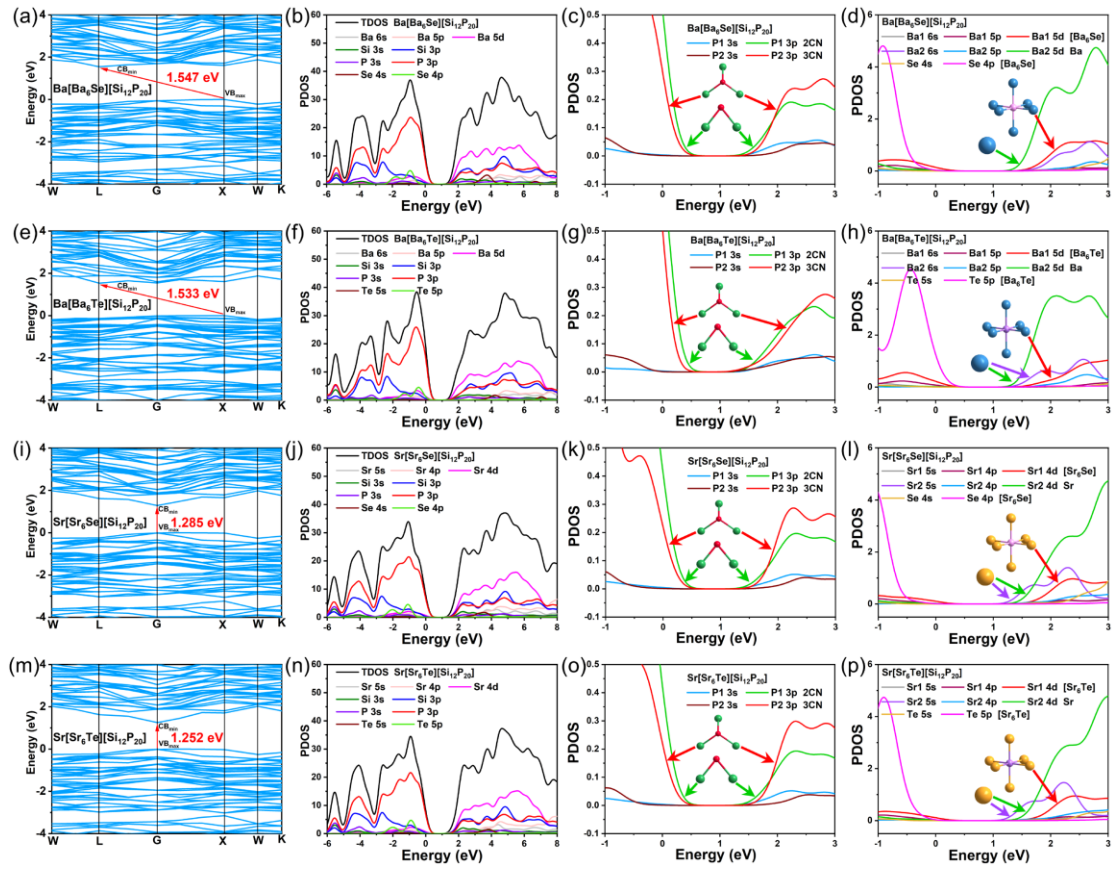

**Figure S8. Band structures and PDOS.** (a, e, i, m) Band structure diagrams, (b, f, j, n) Density of states (DOS) diagrams, (c, g, k, o) Projected density of states (PDOS) of P1 (2CN), P2/P3 (3CN) atoms. (d, h, l, p) PDOS of Ba and [Ba<sub>6</sub>Se], Ba[Ba<sub>6</sub>Te], [Sr<sub>6</sub>Se], [Sr<sub>6</sub>Te] of Ba[Ba<sub>6</sub>Se][Si<sub>12</sub>P<sub>20</sub>], Ba[Ba<sub>6</sub>Te][Si<sub>12</sub>P<sub>20</sub>], Sr[Sr<sub>6</sub>Se][Si<sub>12</sub>P<sub>20</sub>] and Sr[Sr<sub>6</sub>Te][Si<sub>12</sub>P<sub>20</sub>].

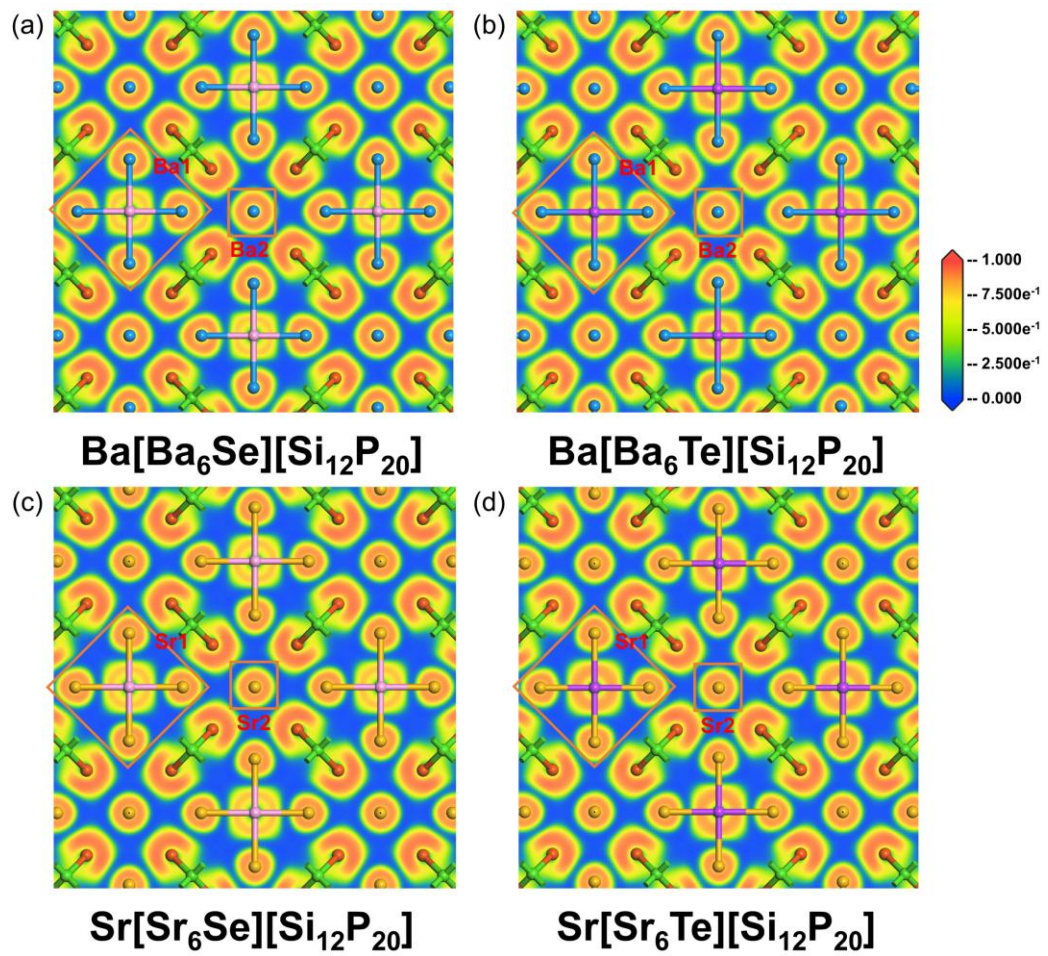

**Figure S9. ELF diagrams.** Slice electron localization function (ELF) field distribution of Ba[Ba<sub>6</sub>Se][Si<sub>12</sub>P<sub>20</sub>] (a), Ba[Ba<sub>6</sub>Te][Si<sub>12</sub>P<sub>20</sub>] (b), Sr[Sr<sub>6</sub>Se][Si<sub>12</sub>P<sub>20</sub>] (c) and Sr[Sr<sub>6</sub>Te][Si<sub>12</sub>P<sub>20</sub>] (d).

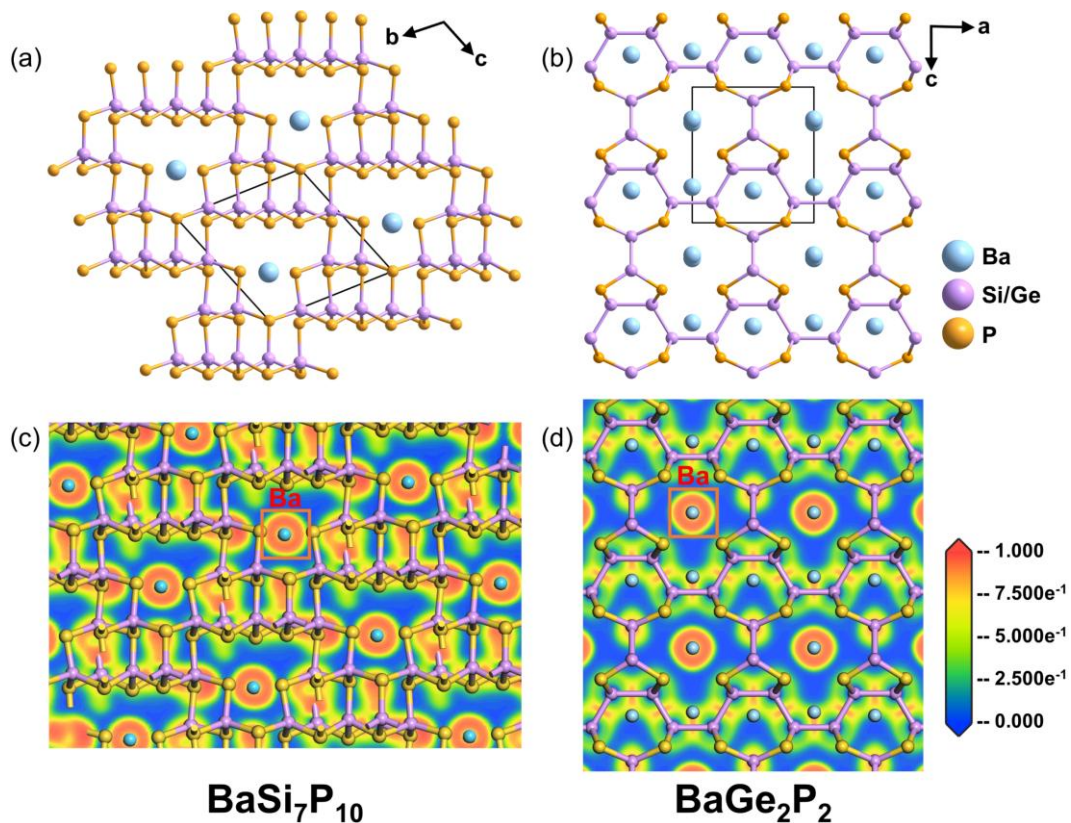

**Figure S10. Crystal structure and ELF diagrams.** (a, b) Crystal structures of BaSi<sub>7</sub>P<sub>10</sub> and BaGe<sub>2</sub>P<sub>2</sub>; (c, d) corresponding slice ELF field distributions.

**References:**

- [1]. G. M. Sheldrick. *Acta. Cryst.* 2008. A64, 112.
- [2]. G. M. Sheldrick, *Cryst. Struct. Chem.* 2015. **71**, 3-8.
- [3]. A. Spek, *J. Appl. Crystallog.* 2003. **36**, 7-13.
- [4]. P. Kubelka and F. Munk, *Z Tech Phys*, 1931, **12**: 593-601.
- [5]. S. Kurtz and T. Perry, *J. Appl. Phys.* 1968, **39**, 3798-3813.
- [6]. S. J. Clark, M. D. Segall, C. J. Pickard, P. J. Hasnip, M. J. Probert, K. Refson and M. C. Payne, *Z. Kristallogr. Cryst. Mater.* 2005, **220**, 567-570.
- [7]. W. Kohn and L. J. Sham, *Phys. Rev.* 1965, **140**, A1133-A1138.
- [8]. M. Segall, P. J. Lindan, M. a. Probert, C. J. Pickard, P. J. Hasnip, S. Clark and M. Payne, *J. Phys. Condens. Matter.* 2002, **14**, 2717-2744.
- [9]. J. P. Perdew and Y. Wang, *Phys. Rev. B.* 1992, **46**, 12947-12954.
- [10]. J. Lin, A. Qteish, M. Payne and V. Heine, *Phys. Rev. B.* 1993, **47**, 4174-4180.
- [11]. A. M. Rappe, K. M. Rabe, E. Kaxiras and J. Joannopoulos, 1990, **41**, 1227-1230.
- [12]. J. P. Perdew, A. Ruzsinszky, G. I. Csonka, O. A. Vydrov, G. E. Scuseria, L. A. Constantin, X. Zhou and K. Burke, *Phys. Rev. Lett.* 2008, **100**, 136406.
- [13]. J. P. Perdew, K. Burke and M. Ernzerhof, *Phys. Rev. Lett.* 1996, **77**, 3865-3868.
- [14]. Y. Wang, P. Wisesa, A. Balasubramanian, S. Dwaraknath and T. Mueller, *Comput. Mater. Sci.* 2021, **187**, 110100.
- [15]. X. Gonze, *Phys. Rev. A.* 1995, **52**, 1096-1114.

- [16]. X. Gonze, *Phys. Rev. A.* 1995, **52**, 1086-1095.
- [17]. S. Sharma and C. Ambrosch-Draxl, *Phys. Scr.* 2004, **2004**, 128-134.
- [18]. C.-S. Lin, A.-Y. Zhou, W.-D. Cheng, N. Ye and G.-L. Chai, *J. Phys. Chem. C.* 2019, **123**, 31183–31189.
- [19]. N. R. Spagnuolo, G. Morrison and H.-C. zur Loye, *Solid. State. Sci.* 2019, **97**, 105973.
- [20]. D. Carone, G. Morrison, M. D. Smith and H.-C. zur Loye, *Cryst. Growth. Des.* 2022, **22**, 3319-3325.
- [21]. D. Carone, M. Usman, V. V. Klepov, M. D. Smith, V. Kocevski, T. M. Besmann and H.-C. zur Loye, *CrystEngComm.* 2020, **22**, 8072-8080.
- [22]. G. Morrison and H.-C. zur Loye, *Cryst. Growth. Des.* 2016, **16**, 1294-1299.
- [23]. C. A. Juillerat, E. E. Moore, G. Morrison, M. D. Smith, T. Besmann and H.-C. Zur Loye, *Inorg. Chem.* 2018, **57**, 11606-11615.
- [24]. R. Wang, X. Zhang and F. Huang, *Sci. China. Chem.* 2022, **65**, 1903-1910.
- [25]. A. A. Berseneva, L. W. Masachchi, L. G. Jacobsohn and H.-C. zur Loye, *Chem. Mater.* 2023, **35**, 1417-1431.
- [26]. H. Lin, L.-H. Li and L. Chen, *Inorg. Chem.* 2012, **51**, 4588-4596.
- [27]. H. Lin, H. Chen, Z.-X. Lin, H.-J. Zhao, P.-F. Liu, J.-S. Yu and L. Chen, *Inorg. Chem.* 2016, **55**, 1014-1016.
- [28]. S. X. Huang - Fu, J. N. Shen, H. Lin, L. Chem. - Eur. J. 2015, **21**, 9809-9815.
- [29]. G. Santarini, *Electrochim. Acta.* 1982, **27**, 495-510.
- [30]. P. Adler, S. A. Medvedev, M. Valldor, P. G. Naumov, M. A. ElGhazali and R. Ruffer, *Phys. Rev. B.* 2020, **101**, 094433.
- [31]. J. Llanos, C. Mujica, O. Wittke, P. Gómez-Romero and R. Ramírez, *J. Solid State Chem.* 1997, **128**, 62-65.
- [32]. M. Schwarz and C. Röhr, *Z. Anorg. Allg. Chem.* 2014, **640**, 2792-2800.
- [33]. P. Yox, A. P. Porter, R. W. Dorn, V. Kyveryga, A. J. Rossini and K. Kovnir, *Chem. Commun.* 2022, **58**, 7622-7625.
- [34]. Y.-H. Roh and S.-T. Hong, *Struct. Rep.* 2005, **61**, i140-i142.
- [35]. M.-Y. Ran, S.-H. Zhou, B.-X. Li, X.-T. Wu, H. Lin and Q.-L. Zhu, *Chem. Mater.* 2024, **36**, 11996-12005.
- [36]. X. Zhao, C. Lin, J. Chen, F. Xu, S. Yang, G. Peng, H. Tian, Y. Han, B. Li and M. Luo, *Adv. Opt. Mater.* 2022, **10**, 2200045.
- [37]. J. Mark, J. Wang, K. Wu, J. G. Lo, S. Lee and K. Kovnir, *J. Am. Chem. Soc.* 2019, **141**, 11976-11983.
- [38]. J. Mark, J. A. Dolyniuk, N. Tran and K. Kovnir, *Z. Anorg. Allg. Chem.* 2019, **645**, 242-247.
- [39]. L. Gao, J. Chen, X. Shi, Y. Xiao, Y. Han, C. Lin, H. Jiang, G. Yang, G. Peng and N. Ye, *Sci. Adv.* 2024, **10**, eadr2389.
- [40]. M.-S. Zhang, S.-M. Pei, B.-W. Liu, X.-M. Jiang and G.-C. Guo, *Sci. China Chem.* 2025, **68**, 4134-4140.
